# Supplementary material for: Great Expectations? Relation of Previous Experiences With Social Robots in Real Life or in the Media and Expectancies Based on Qualitative and Quantitative Assessment
Source: Front Psychol. 2019 Apr 30;10:939. doi: 10.3389/fpsyg.2019.00939 (PMC6503083; doi:10.3389/fpsyg.2019.00939)
Supplement: Supplementary file 2 [file Data_Sheet_1.xlsx]

## Sheet: Dataset Great Expectations
CASE	C_IR	CF_IR	CF2_IR	CI_IR	C_DNR	CF_DNR	CF2_DNR	CI_DNR	C_SR	CF_SR	CF2_SR	CI_SR	C_OR	CF_OR	CF2_OR	CI_OR	R_IR	RF_IR	RF2_IR	RI_IR	R_DNR	RF_DNR	RF2_DNR	RI_DNR	R_SR	RF_SR	RF2_SR	RI_SR	R_OR	RF_OR	RF2_OR	RI_OR	F_RM	F_MS1	F_MS2	F_MS3	F_MS4	F_MS5	F_MS6	F_MS7	F_MS8	F_MS9	F_MS10	F_MS11	F_MS12	F_MS13	F_MS14	F_MS15	F_MS16
Interview number	Contact with industrial robot	Contact frequency industrial robot	Contact frequency industrial robot (free input)	Contact intensity industrial robot	Contact with domestic non-social robots	Contact frequency domestic non-social robots	Contact frequency domestic non-social robots (free input)	Contact intensity domestic non-social robots	Contact with social robot	Contact frequency social robot	Contact frequency social robot (free input)	Contact intensity social robot	Contact with other robot	Contact frequency other robot	Contact frequency other robot (free input)	Contact intensity other robot	Reports about industrial robot	Report frequency industrial robot	Report frequency industrial robot (free input)	Report intensity industrial robot	Reports about domestic non-social robot	Report frequency non-domestic social robot	Report frequency non-domestic social robot	Report intensity non-domestic social robot	Reports about social robot	Report frequency social robot	Report frequency social robot (free input)	Report intensity social robot	Reports about other robot	Report frequency other robot	Report frequency other robot (free input)	Report intensity other robot	Frequency of watching robot movies/series	Frequency of watching Terminator	Frequency of watching Matrix	Frequency of watching Blade Runner	Frequency of watching 2001: A Space Odyssey	Frequency of watching I, Robot	Frequency of watching Avengers: Age of Ultron	Frequency of watching Westworld	Frequency of watching Star Trek: The Next Generation	Frequency of watching Battlestar Galactica	Frequency of watching Transformers	Frequency of watching AI: Artificial intelligence	Frequency of watching Wall-E	Frequency of watching Star Wars	Frequency of watching Ex Machina	Frequency of watching Short Circuit	Frequency of watching Forbidden Planet
280	0	#NULL!	#NULL!	0	0	#NULL!	#NULL!	0	0	#NULL!	#NULL!	0	0	#NULL!	#NULL!	0	0	#NULL!	#NULL!	0	0	#NULL!	#NULL!	0	0	#NULL!	#NULL!	0	0	#NULL!	#NULL!	0	3	#NULL!	4	1	#NULL!	#NULL!	3	#NULL!	#NULL!	#NULL!	3	2	#NULL!	4	#NULL!	#NULL!	#NULL!
282	0	#NULL!	#NULL!	0	1	2	#NULL!	1	0	#NULL!	#NULL!	0	0	#NULL!	#NULL!	0	1	3	7	4	1	1	1	1	1	3	3	3	0	#NULL!	0	0	2	#NULL!	#NULL!	#NULL!	3	#NULL!	4	#NULL!	#NULL!	#NULL!	4	#NULL!	5	#NULL!	4	#NULL!	#NULL!
283	0	#NULL!	#NULL!	0	1	3	6	3	0	#NULL!	#NULL!	0	0	#NULL!	#NULL!	0	0	#NULL!	#NULL!	0	0	#NULL!	#NULL!	0	0	#NULL!	#NULL!	0	0	#NULL!	#NULL!	0	2	#NULL!	#NULL!	#NULL!	#NULL!	5	#NULL!	#NULL!	#NULL!	#NULL!	5	3	3	#NULL!	#NULL!	4	#NULL!
285	1	1	10	5	1	5	100	4	0	#NULL!	#NULL!	0	0	#NULL!	#NULL!	0	1	5	15	4	1	4	15	4	1	3	5	4	1	5	30	5	5	5	5	5	3	5	5	#NULL!	5	5	5	5	#NULL!	5	5	5	#NULL!
287	0	#NULL!	#NULL!	0	1	3	10	3	0	#NULL!	#NULL!	0	0	#NULL!	#NULL!	0	1	2	5	4	1	1	1	2	1	1	1	2	0	#NULL!	#NULL!	0	3	4	4	4	3	5	3	4	5	5	3	4	5	4	4	5	2
290	0	#NULL!	#NULL!	0	1	5	20	4	0	#NULL!	#NULL!	0	0	#NULL!	#NULL!	0	0	#NULL!	#NULL!	0	1	1	1	1	1	1	1	2	0	#NULL!	#NULL!	0	3	2	4	1	1	4	5	1	3	1	4	5	5	3	5	3	1
291	0	#NULL!	#NULL!	0	0	#NULL!	#NULL!	0	0	#NULL!	#NULL!	0	0	#NULL!	#NULL!	0	1	2	5	2	0	#NULL!	#NULL!	0	1	2	6	2	0	#NULL!	#NULL!	0	2	#NULL!	2	#NULL!	#NULL!	2	#NULL!	#NULL!	#NULL!	#NULL!	#NULL!	#NULL!	#NULL!	#NULL!	#NULL!	#NULL!	#NULL!
292	0	#NULL!	#NULL!	0	0	#NULL!	#NULL!	0	0	#NULL!	#NULL!	0	0	#NULL!	#NULL!	0	1	3	5	4	1	3	2	4	1	4	7	5	0	#NULL!	#NULL!	0	3	3	3	2	#NULL!	4	2	#NULL!	4	2	2	#NULL!	5	5	#NULL!	#NULL!	#NULL!
293	0	#NULL!	#NULL!	0	0	#NULL!	#NULL!	0	0	#NULL!	#NULL!	0	0	#NULL!	#NULL!	0	1	1	2	1	0	#NULL!	#NULL!	0	0	#NULL!	#NULL!	0	0	#NULL!	#NULL!	0	1	#NULL!	#NULL!	#NULL!	#NULL!	#NULL!	#NULL!	#NULL!	#NULL!	#NULL!	#NULL!	#NULL!	#NULL!	#NULL!	#NULL!	#NULL!	#NULL!
294	0	#NULL!	#NULL!	0	0	#NULL!	#NULL!	0	0	#NULL!	#NULL!	0	0	#NULL!	#NULL!	0	0	#NULL!	#NULL!	0	0	#NULL!	#NULL!	0	0	#NULL!	#NULL!	0	0	#NULL!	#NULL!	0	1	#NULL!	#NULL!	#NULL!	#NULL!	#NULL!	#NULL!	#NULL!	#NULL!	#NULL!	#NULL!	#NULL!	#NULL!	#NULL!	#NULL!	#NULL!	#NULL!
295	0	#NULL!	#NULL!	0	0	#NULL!	#NULL!	0	0	#NULL!	#NULL!	0	0	#NULL!	#NULL!	0	1	1	1	2	1	3	4	2	1	1	1	1	0	#NULL!	#NULL!	0	1	1	2	#NULL!	#NULL!	2	#NULL!	#NULL!	#NULL!	#NULL!	3	#NULL!	5	4	#NULL!	#NULL!	#NULL!
296	0	#NULL!	#NULL!	0	1	5	#NULL!	4	0	#NULL!	#NULL!	0	0	#NULL!	#NULL!	0	1	1	3	3	0	#NULL!	#NULL!	0	0	#NULL!	#NULL!	0	0	#NULL!	#NULL!	0	1	#NULL!	#NULL!	#NULL!	#NULL!	4	5	#NULL!	#NULL!	#NULL!	2	#NULL!	3	5	#NULL!	5	#NULL!
297	0	#NULL!	#NULL!	0	1	3	3	1	0	#NULL!	#NULL!	0	0	#NULL!	#NULL!	0	1	4	20	4	0	#NULL!	#NULL!	0	1	2	4	3	0	#NULL!	#NULL!	0	4	#NULL!	#NULL!	#NULL!	#NULL!	#NULL!	#NULL!	#NULL!	#NULL!	#NULL!	4	#NULL!	#NULL!	#NULL!	#NULL!	#NULL!	#NULL!
298	0	#NULL!	#NULL!	0	1	1	2	2	0	#NULL!	#NULL!	0	1	3	100	1	1	3	10	3	0	#NULL!	#NULL!	0	0	#NULL!	#NULL!	0	0	#NULL!	#NULL!	0	1	1	1	#NULL!	#NULL!	1	2	#NULL!	#NULL!	#NULL!	#NULL!	#NULL!	#NULL!	4	#NULL!	#NULL!	#NULL!
300	0	#NULL!	#NULL!	0	0	#NULL!	#NULL!	0	0	#NULL!	#NULL!	0	0	#NULL!	#NULL!	0	1	2	3	2	1	2	2	1	0	#NULL!	#NULL!	0	0	#NULL!	#NULL!	0	3	3	5	#NULL!	#NULL!	2	4	#NULL!	1	#NULL!	2	2	4	4	#NULL!	4	#NULL!
303	0	#NULL!	#NULL!	0	0	#NULL!	#NULL!	0	1	1	2	3	0	#NULL!	#NULL!	0	1	4	6	2	0	#NULL!	#NULL!	0	1	4	8	5	0	#NULL!	#NULL!	0	3	#NULL!	4	#NULL!	#NULL!	#NULL!	#NULL!	#NULL!	2	#NULL!	3	#NULL!	5	1	#NULL!	1	#NULL!
304	0	#NULL!	#NULL!	0	1	1	5	2	1	3	20	3	1	5	100	5	1	1	3	3	0	#NULL!	#NULL!	0	1	3	2	3	1	2	4	3	3	3	4	#NULL!	#NULL!	4	5	#NULL!	5	#NULL!	5	3	5	5	#NULL!	5	#NULL!
308	0	#NULL!	#NULL!	0	0	#NULL!	#NULL!	0	0	#NULL!	#NULL!	0	0	#NULL!	#NULL!	0	1	1	1	2	0	#NULL!	#NULL!	0	0	#NULL!	#NULL!	0	0	#NULL!	#NULL!	0	3	4	4	#NULL!	#NULL!	3	4	4	4	#NULL!	5	3	5	4	#NULL!	4	#NULL!
310	0	#NULL!	#NULL!	0	1	1	6	1	0	#NULL!	#NULL!	0	0	#NULL!	#NULL!	0	1	4	30	3	1	2	3	2	1	2	2	3	0	#NULL!	#NULL!	0	4	#NULL!	4	2	#NULL!	4	#NULL!	3	4	#NULL!	1	#NULL!	3	5	#NULL!	4	#NULL!
311	0	#NULL!	#NULL!	0	1	4	10	4	0	#NULL!	#NULL!	0	1	2	20	3	0	#NULL!	#NULL!	0	0	#NULL!	#NULL!	0	0	#NULL!	#NULL!	0	0	#NULL!	#NULL!	0	2	#NULL!	#NULL!	#NULL!	#NULL!	#NULL!	#NULL!	#NULL!	#NULL!	#NULL!	1	#NULL!	1	#NULL!	#NULL!	#NULL!	#NULL!
312	1	2	3	2	1	5	15	4	0	#NULL!	#NULL!	0	0	#NULL!	#NULL!	0	1	3	4	3	1	3	5	3	0	#NULL!	#NULL!	0	0	#NULL!	#NULL!	0	4	5	5	3	5	4	5	1	2	2	4	1	2	5	3	1	1
313	1	3	50	3	1	3	10	3	1	1	3	2	0	#NULL!	#NULL!	0	0	#NULL!	#NULL!	0	0	#NULL!	#NULL!	0	0	#NULL!	#NULL!	0	0	#NULL!	#NULL!	0	5	5	5	5	4	5	5	5	5	5	5	4	5	5	5	2	1
316	1	2	3	3	1	3	10	3	0	#NULL!	#NULL!	0	0	#NULL!	#NULL!	0	1	3	6	4	1	3	5	3	1	3	2	3	1	3	3	3	3	5	5	5	5	5	5	5	5	5	5	5	5	5	5	5	#NULL!
318	0	#NULL!	#NULL!	0	0	#NULL!	#NULL!	0	0	#NULL!	#NULL!	0	0	#NULL!	#NULL!	0	0	#NULL!	#NULL!	0	1	1	1	1	0	#NULL!	#NULL!	0	0	#NULL!	#NULL!	0	3	#NULL!	1	#NULL!	#NULL!	5	#NULL!	#NULL!	#NULL!	#NULL!	#NULL!	#NULL!	3	1	#NULL!	#NULL!	#NULL!
319	1	2	30	4	0	#NULL!	#NULL!	0	0	#NULL!	#NULL!	0	0	#NULL!	#NULL!	0	1	2	5	3	1	2	2	2	1	3	4	4	0	#NULL!	#NULL!	0	4	4	4	#NULL!	#NULL!	4	5	1	#NULL!	#NULL!	3	#NULL!	5	5	#NULL!	#NULL!	#NULL!
322	0	#NULL!	#NULL!	0	1	1	2	3	1	1	1	4	0	#NULL!	#NULL!	0	1	2	3	2	1	1	2	2	1	2	2	3	0	#NULL!	#NULL!	0	2	4	3	2	3	4	2	#NULL!	4	1	4	#NULL!	5	3	#NULL!	#NULL!	#NULL!
325	1	5	100	5	1	2	5	2	1	5	100	5	1	5	100	5	1	3	6	4	1	2	2	2	1	4	7	4	0	#NULL!	#NULL!	0	5	5	5	5	2	5	5	5	3	2	1	4	4	5	3	1	1
326	0	#NULL!	#NULL!	0	0	#NULL!	#NULL!	0	0	#NULL!	#NULL!	0	0	#NULL!	#NULL!	0	0	#NULL!	#NULL!	0	0	#NULL!	#NULL!	0	0	#NULL!	#NULL!	0	0	#NULL!	#NULL!	0	3	#NULL!	1	1	#NULL!	2	2	#NULL!	#NULL!	#NULL!	2	2	2	2	#NULL!	1	#NULL!
327	0	#NULL!	#NULL!	0	1	5	500	4	0	#NULL!	#NULL!	0	0	#NULL!	#NULL!	0	1	2	5	1	1	2	10	2	1	1	2	2	0	#NULL!	#NULL!	0	1	#NULL!	4	#NULL!	5	#NULL!	#NULL!	#NULL!	2	#NULL!	#NULL!	#NULL!	5	4	#NULL!	#NULL!	#NULL!
328	0	#NULL!	#NULL!	0	1	1	1	2	0	#NULL!	#NULL!	0	0	#NULL!	#NULL!	0	1	1	1	1	0	#NULL!	#NULL!	0	0	#NULL!	#NULL!	0	0	#NULL!	#NULL!	0	3	#NULL!	#NULL!	#NULL!	#NULL!	5	#NULL!	#NULL!	#NULL!	#NULL!	5	#NULL!	5	5	#NULL!	3	#NULL!
330	0	#NULL!	#NULL!	0	1	3	50	2	0	#NULL!	#NULL!	0	0	#NULL!	#NULL!	0	1	1	2	3	0	#NULL!	#NULL!	0	0	#NULL!	#NULL!	0	0	#NULL!	#NULL!	0	3	3	5	#NULL!	#NULL!	#NULL!	4	#NULL!	3	#NULL!	3	4	5	5	#NULL!	#NULL!	#NULL!
332	0	#NULL!	#NULL!	0	0	#NULL!	#NULL!	0	0	#NULL!	#NULL!	0	0	#NULL!	#NULL!	0	1	1	2	3	1	1	1	3	1	2	2	4	0	#NULL!	#NULL!	0	2	#NULL!	3	#NULL!	#NULL!	#NULL!	#NULL!	#NULL!	5	#NULL!	2	#NULL!	3	4	#NULL!	4	#NULL!
334	0	#NULL!	#NULL!	0	1	2	5	1	0	#NULL!	#NULL!	0	0	#NULL!	#NULL!	0	1	2	3	2	0	#NULL!	#NULL!	0	1	2	3	3	1	1	1	2	5	4	5	4	#NULL!	2	4	#NULL!	4	4	4	3	2	5	3	4	#NULL!
338	0	#NULL!	#NULL!	0	1	2	3	2	0	#NULL!	#NULL!	0	0	#NULL!	#NULL!	0	0	#NULL!	#NULL!	0	0	#NULL!	#NULL!	0	0	#NULL!	#NULL!	0	0	#NULL!	#NULL!	0	3	#NULL!	#NULL!	#NULL!	#NULL!	2	#NULL!	#NULL!	#NULL!	#NULL!	2	#NULL!	#NULL!	2	#NULL!	#NULL!	#NULL!
339	0	#NULL!	#NULL!	0	0	#NULL!	#NULL!	0	0	#NULL!	#NULL!	0	0	#NULL!	#NULL!	0	1	2	20	3	1	1	5	3	1	1	3	2	0	#NULL!	#NULL!	0	4	2	2	#NULL!	#NULL!	2	#NULL!	#NULL!	#NULL!	#NULL!	#NULL!	#NULL!	5	#NULL!	#NULL!	#NULL!	#NULL!
340	1	1	3	2	1	1	3	2	1	1	2	2	0	#NULL!	#NULL!	0	1	2	6	3	0	#NULL!	#NULL!	0	1	1	2	3	0	#NULL!	#NULL!	0	2	2	#NULL!	#NULL!	#NULL!	4	#NULL!	#NULL!	#NULL!	#NULL!	4	#NULL!	5	3	#NULL!	#NULL!	#NULL!
341	0	#NULL!	#NULL!	0	1	2	3	1	0	#NULL!	#NULL!	0	0	#NULL!	#NULL!	0	1	1	2	2	1	2	5	2	1	1	1	2	0	#NULL!	#NULL!	0	1	#NULL!	#NULL!	1	#NULL!	2	#NULL!	#NULL!	3	#NULL!	#NULL!	#NULL!	2	#NULL!	#NULL!	#NULL!	#NULL!
342	0	#NULL!	#NULL!	0	0	#NULL!	#NULL!	0	0	#NULL!	#NULL!	0	0	#NULL!	#NULL!	0	1	1	3	1	0	#NULL!	#NULL!	0	1	2	4	2	1	1	2	5	5	#NULL!	3	#NULL!	#NULL!	#NULL!	#NULL!	#NULL!	5	#NULL!	#NULL!	3	5	5	5	#NULL!	#NULL!
343	1	1	1	2	1	2	2	4	1	1	1	3	0	#NULL!	#NULL!	0	0	#NULL!	#NULL!	0	0	#NULL!	#NULL!	0	0	#NULL!	#NULL!	0	0	#NULL!	#NULL!	0	3	#NULL!	2	#NULL!	#NULL!	4	#NULL!	#NULL!	#NULL!	#NULL!	#NULL!	#NULL!	5	#NULL!	#NULL!	#NULL!	#NULL!
344	0	#NULL!	#NULL!	0	0	#NULL!	#NULL!	0	0	#NULL!	#NULL!	0	0	#NULL!	#NULL!	0	1	4	40	3	1	2	20	2	1	1	5	4	0	#NULL!	#NULL!	0	4	#NULL!	5	#NULL!	#NULL!	4	5	#NULL!	2	#NULL!	5	3	5	5	#NULL!	#NULL!	#NULL!
345	0	#NULL!	#NULL!	0	1	2	3	1	0	#NULL!	#NULL!	0	1	1	1	2	1	4	20	4	0	#NULL!	#NULL!	0	0	#NULL!	#NULL!	0	0	#NULL!	#NULL!	0	1	#NULL!	#NULL!	#NULL!	#NULL!	5	#NULL!	#NULL!	1	#NULL!	3	#NULL!	3	#NULL!	#NULL!	5	#NULL!
346	0	#NULL!	#NULL!	0	1	2	5	5	0	#NULL!	#NULL!	0	0	#NULL!	#NULL!	0	1	3	9	4	1	1	2	1	1	1	1	5	0	#NULL!	#NULL!	0	1	#NULL!	#NULL!	#NULL!	#NULL!	3	#NULL!	#NULL!	3	#NULL!	5	#NULL!	4	5	1	#NULL!	#NULL!
347	0	#NULL!	#NULL!	0	0	#NULL!	#NULL!	0	0	#NULL!	#NULL!	0	0	#NULL!	#NULL!	0	1	2	10	3	1	1	2	3	0	#NULL!	#NULL!	0	0	#NULL!	#NULL!	0	1	#NULL!	#NULL!	#NULL!	#NULL!	#NULL!	#NULL!	#NULL!	4	#NULL!	#NULL!	#NULL!	#NULL!	4	#NULL!	2	#NULL!
349	0	#NULL!	#NULL!	0	1	3	30	1	0	#NULL!	#NULL!	0	0	#NULL!	#NULL!	0	1	1	1	1	0	#NULL!	#NULL!	0	0	#NULL!	#NULL!	0	0	#NULL!	#NULL!	0	3	#NULL!	#NULL!	#NULL!	#NULL!	5	#NULL!	#NULL!	5	#NULL!	3	#NULL!	5	5	#NULL!	5	#NULL!
351	0	#NULL!	#NULL!	0	1	1	2	2	0	#NULL!	#NULL!	0	0	#NULL!	#NULL!	0	1	2	8	3	0	#NULL!	#NULL!	0	1	1	1	3	0	#NULL!	#NULL!	0	4	3	5	#NULL!	#NULL!	4	5	#NULL!	5	3	3	4	5	5	4	5	#NULL!
354	0	#NULL!	#NULL!	0	0	#NULL!	#NULL!	0	0	#NULL!	#NULL!	0	0	#NULL!	#NULL!	0	1	3	6	1	1	1	2	1	0	#NULL!	#NULL!	0	0	#NULL!	#NULL!	0	4	4	#NULL!	2	#NULL!	3	5	#NULL!	2	#NULL!	3	#NULL!	2	5	#NULL!	#NULL!	#NULL!
355	1	1	2	1	0	#NULL!	#NULL!	0	0	#NULL!	#NULL!	0	0	#NULL!	#NULL!	0	1	3	10	3	0	#NULL!	#NULL!	0	0	#NULL!	#NULL!	0	0	#NULL!	#NULL!	0	3	4	#NULL!	#NULL!	#NULL!	5	#NULL!	#NULL!	1	#NULL!	4	#NULL!	3	2	#NULL!	#NULL!	#NULL!
359	0	#NULL!	#NULL!	0	0	#NULL!	#NULL!	0	0	#NULL!	#NULL!	0	0	#NULL!	#NULL!	0	1	2	3	1	0	#NULL!	#NULL!	0	1	1	1	3	0	#NULL!	#NULL!	0	2	2	3	3	#NULL!	3	4	4	2	#NULL!	4	3	5	5	#NULL!	4	#NULL!
362	1	1	1	1	0	#NULL!	#NULL!	0	0	#NULL!	#NULL!	0	0	#NULL!	#NULL!	0	1	1	2	1	1	1	2	1	0	#NULL!	#NULL!	0	0	#NULL!	#NULL!	0	3	1	2	4	#NULL!	5	#NULL!	#NULL!	1	#NULL!	1	#NULL!	1	4	1	#NULL!	#NULL!
363	0	#NULL!	#NULL!	0	0	#NULL!	#NULL!	0	1	3	5	3	0	#NULL!	#NULL!	0	1	1	1	1	0	#NULL!	#NULL!	0	1	2	2	2	0	#NULL!	#NULL!	0	1	2	4	5	5	5	4	#NULL!	2	#NULL!	5	3	5	5	#NULL!	#NULL!	#NULL!
368	0	#NULL!	#NULL!	0	1	2	3	1	1	1	1	3	0	#NULL!	#NULL!	0	1	2	3	1	0	#NULL!	#NULL!	0	1	2	3	3	0	#NULL!	#NULL!	0	1	#NULL!	5	#NULL!	#NULL!	5	#NULL!	#NULL!	#NULL!	#NULL!	#NULL!	#NULL!	5	3	#NULL!	2	#NULL!
369	0	#NULL!	#NULL!	0	1	1	2	1	0	#NULL!	#NULL!	0	0	#NULL!	#NULL!	0	1	1	1	3	0	#NULL!	#NULL!	0	1	1	1	3	1	1	2	3	3	5	#NULL!	2	#NULL!	3	#NULL!	#NULL!	#NULL!	#NULL!	5	#NULL!	5	5	#NULL!	5	#NULL!
371	0	#NULL!	#NULL!	0	1	5	50	5	0	#NULL!	#NULL!	0	0	#NULL!	#NULL!	0	0	#NULL!	#NULL!	0	0	#NULL!	#NULL!	0	0	#NULL!	#NULL!	0	0	#NULL!	#NULL!	0	2	#NULL!	3	#NULL!	#NULL!	#NULL!	#NULL!	#NULL!	#NULL!	#NULL!	3	#NULL!	5	3	#NULL!	#NULL!	#NULL!
372	0	#NULL!	#NULL!	0	0	#NULL!	#NULL!	0	1	1	3	3	0	#NULL!	#NULL!	0	0	#NULL!	#NULL!	0	1	3	10	3	0	#NULL!	#NULL!	0	0	#NULL!	#NULL!	0	2	#NULL!	5	#NULL!	#NULL!	5	#NULL!	5	#NULL!	#NULL!	3	#NULL!	3	1	#NULL!	#NULL!	#NULL!
374	0	#NULL!	#NULL!	0	0	#NULL!	#NULL!	0	1	1	1	1	0	#NULL!	#NULL!	0	0	#NULL!	#NULL!	0	0	#NULL!	#NULL!	0	1	1	1	1	0	#NULL!	#NULL!	0	2	2	3	#NULL!	#NULL!	#NULL!	4	#NULL!	4	#NULL!	4	#NULL!	#NULL!	1	#NULL!	#NULL!	#NULL!
376	0	#NULL!	#NULL!	0	0	#NULL!	#NULL!	0	0	#NULL!	#NULL!	0	0	#NULL!	#NULL!	0	0	#NULL!	#NULL!	0	0	#NULL!	#NULL!	0	0	#NULL!	#NULL!	0	0	#NULL!	#NULL!	0	1	#NULL!	#NULL!	#NULL!	#NULL!	3	#NULL!	#NULL!	2	#NULL!	3	#NULL!	#NULL!	#NULL!	#NULL!	#NULL!	#NULL!
382	0	#NULL!	#NULL!	0	1	1	2	1	0	#NULL!	#NULL!	0	1	1	10	3	0	#NULL!	#NULL!	0	0	#NULL!	#NULL!	0	1	1	1	1	0	#NULL!	#NULL!	0	1	2	2	#NULL!	#NULL!	1	#NULL!	#NULL!	#NULL!	#NULL!	1	#NULL!	#NULL!	3	#NULL!	#NULL!	#NULL!
383	1	2	7	3	1	1	2	2	1	1	2	3	0	#NULL!	#NULL!	0	1	3	25	2	0	#NULL!	#NULL!	0	1	2	3	2	1	#NULL!	#NULL!	0	4	2	5	#NULL!	#NULL!	#NULL!	4	#NULL!	3	#NULL!	4	#NULL!	4	3	5	#NULL!	#NULL!
384	1	1	6	4	0	#NULL!	#NULL!	0	1	2	35	2	0	#NULL!	#NULL!	0	1	4	12	5	0	#NULL!	#NULL!	0	1	3	7	4	0	#NULL!	#NULL!	0	5	4	4	5	5	3	2	5	3	#NULL!	#NULL!	2	5	5	4	2	#NULL!
386	1	2	2	2	1	4	10	3	0	#NULL!	#NULL!	0	0	#NULL!	#NULL!	0	1	2	2	3	1	4	7	4	0	#NULL!	#NULL!	0	0	#NULL!	#NULL!	0	3	4	4	2	#NULL!	#NULL!	#NULL!	#NULL!	4	#NULL!	#NULL!	2	#NULL!	5	#NULL!	#NULL!	#NULL!
393	0	#NULL!	#NULL!	0	1	1	2	2	0	#NULL!	#NULL!	0	0	#NULL!	#NULL!	0	1	2	2.5	2	1	1	1	1	1	1	1	3	0	#NULL!	#NULL!	0	1	#NULL!	#NULL!	#NULL!	#NULL!	#NULL!	#NULL!	#NULL!	3	#NULL!	#NULL!	#NULL!	#NULL!	3	#NULL!	#NULL!	#NULL!
403	0	#NULL!	#NULL!	0	1	1	1	1	0	#NULL!	#NULL!	0	0	#NULL!	#NULL!	0	1	2	5	3	0	#NULL!	#NULL!	0	0	#NULL!	#NULL!	0	0	#NULL!	#NULL!	0	4	2	4	5	#NULL!	3	#NULL!	5	2	1	#NULL!	#NULL!	#NULL!	2	4	#NULL!	#NULL!
406	0	#NULL!	#NULL!	0	0	#NULL!	#NULL!	0	0	#NULL!	#NULL!	0	0	#NULL!	#NULL!	0	1	3	10	4	1	1	2	3	0	#NULL!	#NULL!	0	0	#NULL!	#NULL!	0	1	5	5	5	#NULL!	#NULL!	#NULL!	#NULL!	5	4	#NULL!	#NULL!	#NULL!	#NULL!	#NULL!	5	#NULL!
407	0	#NULL!	#NULL!	0	1	4	50	3	0	#NULL!	#NULL!	0	0	#NULL!	#NULL!	0	0	#NULL!	#NULL!	0	0	#NULL!	#NULL!	0	0	#NULL!	#NULL!	0	0	#NULL!	#NULL!	0	4	2	1	1	1	1	1	1	1	#NULL!	1	1	1	2	1	#NULL!	#NULL!
408	1	5	1000	4	1	1	5	1	0	#NULL!	#NULL!	0	0	#NULL!	#NULL!	0	1	2	10	2	0	#NULL!	#NULL!	0	0	#NULL!	#NULL!	0	0	#NULL!	#NULL!	0	2	3	5	3	#NULL!	#NULL!	#NULL!	5	#NULL!	#NULL!	#NULL!	4	5	#NULL!	5	#NULL!	#NULL!
409	0	#NULL!	#NULL!	0	1	5	1500	3	0	#NULL!	#NULL!	0	0	#NULL!	#NULL!	0	1	3	8	5	0	#NULL!	#NULL!	0	1	3	5	4	0	#NULL!	#NULL!	0	3	#NULL!	4	4	#NULL!	5	4	3	#NULL!	#NULL!	4	4	5	#NULL!	#NULL!	5	3
412	0	#NULL!	#NULL!	0	0	#NULL!	#NULL!	0	0	#NULL!	#NULL!	0	0	#NULL!	#NULL!	0	1	1	1	2	1	1	2	1	1	2	1	2	0	#NULL!	#NULL!	0	1	1	#NULL!	#NULL!	#NULL!	#NULL!	#NULL!	#NULL!	#NULL!	#NULL!	#NULL!	#NULL!	3	4	#NULL!	#NULL!	#NULL!
415	0	#NULL!	#NULL!	0	1	4	20	3	0	#NULL!	#NULL!	0	0	#NULL!	#NULL!	0	0	#NULL!	#NULL!	0	0	#NULL!	#NULL!	0	0	#NULL!	#NULL!	0	0	#NULL!	#NULL!	0	1	#NULL!	4	#NULL!	#NULL!	#NULL!	#NULL!	#NULL!	#NULL!	#NULL!	#NULL!	#NULL!	2	#NULL!	#NULL!	#NULL!	#NULL!
417	0	#NULL!	#NULL!	0	0	#NULL!	#NULL!	0	0	#NULL!	#NULL!	0	0	#NULL!	#NULL!	0	1	1	1	1	1	1	1	1	1	1	2	1	0	#NULL!	#NULL!	0	1	4	4	2	5	1	#NULL!	#NULL!	4	2	#NULL!	5	5	5	#NULL!	5	#NULL!
418	0	#NULL!	#NULL!	0	1	4	100	4	0	#NULL!	#NULL!	0	0	#NULL!	#NULL!	0	1	1	1	4	0	#NULL!	#NULL!	0	0	#NULL!	#NULL!	0	0	#NULL!	#NULL!	0	3	2	2	4	#NULL!	3	#NULL!	#NULL!	1	#NULL!	4	#NULL!	4	4	5	#NULL!	#NULL!
419	1	2	5	2	1	4	100	4	0	#NULL!	#NULL!	0	0	#NULL!	#NULL!	0	1	2	1	2	0	#NULL!	#NULL!	0	0	#NULL!	#NULL!	0	0	#NULL!	#NULL!	0	1	3	3	#NULL!	#NULL!	4	#NULL!	#NULL!	4	#NULL!	#NULL!	#NULL!	#NULL!	#NULL!	#NULL!	3	#NULL!
420	0	#NULL!	#NULL!	0	0	#NULL!	#NULL!	0	0	#NULL!	#NULL!	0	0	#NULL!	#NULL!	0	1	2	3	4	1	3	3	2	1	4	3	3	1	4	2	4	2	#NULL!	4	#NULL!	3	2	#NULL!	#NULL!	#NULL!	#NULL!	2	3	#NULL!	#NULL!	#NULL!	#NULL!	#NULL!
421	0	#NULL!	#NULL!	0	1	1	1	2	0	#NULL!	#NULL!	0	0	#NULL!	#NULL!	0	1	3	10	4	1	2	2	3	0	#NULL!	#NULL!	0	0	#NULL!	#NULL!	0	3	4	4	#NULL!	#NULL!	5	#NULL!	#NULL!	5	3	3	4	2	4	#NULL!	3	#NULL!
430	0	#NULL!	#NULL!	0	1	2	2	3	0	#NULL!	#NULL!	0	1	4	20	5	1	4	15	4	1	1	2	3	1	3	4	4	0	#NULL!	#NULL!	0	5	4	4	3	4	5	5	#NULL!	5	4	5	5	5	5	5	5	#NULL!
436	1	5	200	5	0	#NULL!	#NULL!	0	0	#NULL!	#NULL!	0	0	#NULL!	#NULL!	0	1	3	10	3	1	2	2	2	1	2	2	5	1	2	2	5	3	5	5	5	5	5	5	5	5	5	5	4	5	5	5	5	#NULL!
440	1	2	2.5	1	0	#NULL!	#NULL!	0	0	#NULL!	#NULL!	0	1	1	2.5	1	0	#NULL!	#NULL!	0	0	#NULL!	#NULL!	0	1	1	1	1	1	1	1	1	1	3	4	2	3	2	5	5	4	5	5	#NULL!	#NULL!	3	3	3	#NULL!
443	0	#NULL!	#NULL!	0	0	#NULL!	#NULL!	0	0	#NULL!	#NULL!	0	0	#NULL!	#NULL!	0	1	1	1	1	0	#NULL!	#NULL!	0	0	#NULL!	#NULL!	0	0	#NULL!	#NULL!	0	4	2	1	1	2	3	#NULL!	#NULL!	5	#NULL!	1	1	2	5	#NULL!	#NULL!	#NULL!
445	0	#NULL!	#NULL!	0	1	3	6	2	1	4	20	4	0	#NULL!	#NULL!	0	1	2	5	1	1	3	2	3	0	#NULL!	#NULL!	0	0	#NULL!	#NULL!	0	1	#NULL!	3	#NULL!	#NULL!	3	2	#NULL!	#NULL!	#NULL!	4	#NULL!	5	5	#NULL!	#NULL!	#NULL!
447	0	#NULL!	#NULL!	0	0	#NULL!	#NULL!	0	0	#NULL!	#NULL!	0	0	#NULL!	#NULL!	0	1	2	4	2	0	#NULL!	#NULL!	0	0	#NULL!	#NULL!	0	0	#NULL!	#NULL!	0	3	2	4	1	#NULL!	4	#NULL!	#NULL!	#NULL!	#NULL!	4	#NULL!	#NULL!	5	#NULL!	#NULL!	#NULL!
449	0	#NULL!	#NULL!	0	1	3	10	3	0	#NULL!	#NULL!	0	0	#NULL!	#NULL!	0	1	2	3	2	1	1	1	2	1	1	1	1	0	#NULL!	#NULL!	0	2	4	#NULL!	2	#NULL!	2	1	#NULL!	3	#NULL!	5	1	5	4	#NULL!	#NULL!	#NULL!
450	0	#NULL!	#NULL!	0	1	5	100	5	0	#NULL!	#NULL!	0	0	#NULL!	#NULL!	0	1	2	5	3	0	#NULL!	#NULL!	0	0	#NULL!	#NULL!	0	0	#NULL!	#NULL!	0	2	3	2	#NULL!	#NULL!	4	#NULL!	#NULL!	#NULL!	#NULL!	3	#NULL!	5	4	#NULL!	#NULL!	#NULL!
451	0	#NULL!	#NULL!	0	0	#NULL!	#NULL!	0	0	#NULL!	#NULL!	0	0	#NULL!	#NULL!	0	0	#NULL!	#NULL!	0	0	#NULL!	#NULL!	0	0	#NULL!	#NULL!	0	0	#NULL!	#NULL!	0	3	#NULL!	2	#NULL!	#NULL!	#NULL!	#NULL!	#NULL!	2	#NULL!	#NULL!	#NULL!	4	4	4	#NULL!	#NULL!
452	0	#NULL!	#NULL!	0	1	3	25	3	0	#NULL!	#NULL!	0	0	#NULL!	#NULL!	0	1	1	2	2	0	#NULL!	#NULL!	0	1	1	1	4	0	#NULL!	#NULL!	0	2	3	4	3	#NULL!	4	#NULL!	#NULL!	5	#NULL!	3	5	4	5	#NULL!	4	#NULL!
455	0	#NULL!	#NULL!	0	0	#NULL!	#NULL!	0	0	#NULL!	#NULL!	0	0	#NULL!	#NULL!	0	1	3	20	4	1	4	25	2	1	1	5	5	0	#NULL!	#NULL!	0	2	#NULL!	#NULL!	3	#NULL!	5	#NULL!	#NULL!	3	#NULL!	#NULL!	5	5	4	#NULL!	5	#NULL!
456	0	#NULL!	#NULL!	0	0	#NULL!	#NULL!	0	0	#NULL!	#NULL!	0	0	#NULL!	#NULL!	0	1	2	10	1	1	1	2	1	1	3	20	2	0	#NULL!	#NULL!	0	4	2	3	#NULL!	#NULL!	3	#NULL!	5	#NULL!	#NULL!	3	4	3	#NULL!	#NULL!	3	#NULL!
457	1	1	1	3	0	#NULL!	#NULL!	0	0	#NULL!	#NULL!	0	0	#NULL!	#NULL!	0	1	3	2	4	1	1	1	1	0	#NULL!	#NULL!	0	0	#NULL!	#NULL!	0	3	5	3	3	#NULL!	5	2	#NULL!	2	2	5	#NULL!	5	5	#NULL!	#NULL!	#NULL!
458	0	#NULL!	#NULL!	0	0	#NULL!	#NULL!	0	0	#NULL!	#NULL!	0	0	#NULL!	#NULL!	0	1	2	2	4	0	#NULL!	#NULL!	0	1	2	2	4	0	#NULL!	#NULL!	0	2	#NULL!	2	#NULL!	#NULL!	#NULL!	#NULL!	#NULL!	#NULL!	#NULL!	#NULL!	3	5	#NULL!	#NULL!	#NULL!	#NULL!
462	1	1	1	2	1	3	5	3	0	#NULL!	#NULL!	0	0	#NULL!	#NULL!	0	0	#NULL!	#NULL!	0	0	#NULL!	#NULL!	0	0	#NULL!	#NULL!	0	0	#NULL!	#NULL!	0	1	#NULL!	#NULL!	#NULL!	#NULL!	#NULL!	#NULL!	#NULL!	#NULL!	#NULL!	#NULL!	#NULL!	#NULL!	#NULL!	#NULL!	#NULL!	#NULL!
464	0	#NULL!	#NULL!	0	1	1	2	1	0	#NULL!	#NULL!	0	0	#NULL!	#NULL!	0	1	3	10	3	1	3	3	4	1	2	5	4	1	3	4	4	2	#NULL!	#NULL!	2	#NULL!	#NULL!	2	#NULL!	#NULL!	#NULL!	2	3	#NULL!	3	#NULL!	#NULL!	#NULL!
465	0	#NULL!	#NULL!	0	1	2	5	2	0	#NULL!	#NULL!	0	0	#NULL!	#NULL!	0	1	2	3	3	1	2	3	3	0	#NULL!	#NULL!	0	0	#NULL!	#NULL!	0	4	4	3	#NULL!	#NULL!	5	5	#NULL!	2	#NULL!	3	4	5	#NULL!	5	3	#NULL!
466	0	#NULL!	#NULL!	0	1	1	1	1	0	#NULL!	#NULL!	0	0	#NULL!	#NULL!	0	1	1	3	1	0	#NULL!	#NULL!	0	1	3	3	3	0	#NULL!	#NULL!	0	1	2	3	#NULL!	#NULL!	#NULL!	#NULL!	#NULL!	#NULL!	#NULL!	4	#NULL!	#NULL!	#NULL!	#NULL!	#NULL!	#NULL!
468	0	#NULL!	#NULL!	0	0	#NULL!	#NULL!	0	1	1	1	1	0	#NULL!	#NULL!	0	0	#NULL!	#NULL!	0	0	#NULL!	#NULL!	0	0	#NULL!	#NULL!	0	1	2	2	3	3	#NULL!	3	#NULL!	#NULL!	#NULL!	#NULL!	4	#NULL!	#NULL!	#NULL!	#NULL!	4	3	5	#NULL!	#NULL!
472	1	1	5	2	1	4	40	4	0	#NULL!	#NULL!	0	0	#NULL!	#NULL!	0	1	3	10	4	0	#NULL!	#NULL!	0	1	4	15	5	0	#NULL!	#NULL!	0	3	2	4	#NULL!	5	5	2	#NULL!	5	2	4	4	#NULL!	2	#NULL!	#NULL!	#NULL!
473	0	#NULL!	#NULL!	0	0	#NULL!	#NULL!	0	0	#NULL!	#NULL!	0	0	#NULL!	#NULL!	0	1	2	5	1	1	2	1	1	0	#NULL!	#NULL!	0	0	#NULL!	#NULL!	0	3	3	4	#NULL!	#NULL!	4	#NULL!	5	#NULL!	#NULL!	3	#NULL!	#NULL!	3	4	#NULL!	#NULL!
474	0	#NULL!	#NULL!	0	0	#NULL!	#NULL!	0	0	#NULL!	#NULL!	0	0	#NULL!	#NULL!	0	1	3	8	3	1	3	3	2	1	1	1	3	0	#NULL!	#NULL!	0	4	3	4	#NULL!	#NULL!	5	#NULL!	#NULL!	5	5	5	#NULL!	5	5	#NULL!	5	4
476	0	#NULL!	#NULL!	0	0	#NULL!	#NULL!	0	0	#NULL!	#NULL!	0	0	#NULL!	#NULL!	0	0	#NULL!	#NULL!	0	1	4	10	3	1	3	10	3	0	#NULL!	#NULL!	0	4	3	3	2	#NULL!	#NULL!	#NULL!	#NULL!	4	#NULL!	3	3	#NULL!	4	#NULL!	3	#NULL!
477	0	#NULL!	#NULL!	0	1	3	20	3	0	#NULL!	#NULL!	0	0	#NULL!	#NULL!	0	0	#NULL!	#NULL!	0	1	1	1	1	1	2	2	2	0	#NULL!	#NULL!	0	1	#NULL!	#NULL!	#NULL!	#NULL!	#NULL!	#NULL!	#NULL!	#NULL!	#NULL!	2	#NULL!	3	2	#NULL!	3	#NULL!
481	0	#NULL!	#NULL!	0	1	1	1	1	0	#NULL!	#NULL!	0	0	#NULL!	#NULL!	0	1	1	2	1	1	1	1	1	0	#NULL!	#NULL!	0	0	#NULL!	#NULL!	0	2	5	5	5	#NULL!	5	#NULL!	#NULL!	3	2	5	5	5	4	#NULL!	5	#NULL!
482	0	#NULL!	#NULL!	0	1	2	3	2	0	#NULL!	#NULL!	0	0	#NULL!	#NULL!	0	1	1	1	2	0	#NULL!	#NULL!	0	0	#NULL!	#NULL!	0	0	#NULL!	#NULL!	0	3	1	5	3	#NULL!	5	#NULL!	#NULL!	1	1	1	5	5	3	#NULL!	#NULL!	#NULL!
483	0	#NULL!	#NULL!	0	1	1	2	2	0	#NULL!	#NULL!	0	0	#NULL!	#NULL!	0	1	1	2	2	0	#NULL!	#NULL!	0	1	1	1	2	0	#NULL!	#NULL!	0	2	1	1	#NULL!	#NULL!	#NULL!	#NULL!	#NULL!	2	#NULL!	3	#NULL!	5	#NULL!	#NULL!	#NULL!	#NULL!
484	0	#NULL!	#NULL!	0	1	5	100	3	0	#NULL!	#NULL!	0	0	#NULL!	#NULL!	0	1	2	2	2	0	#NULL!	#NULL!	0	0	#NULL!	#NULL!	0	0	#NULL!	#NULL!	0	3	#NULL!	4	#NULL!	#NULL!	#NULL!	5	#NULL!	#NULL!	#NULL!	#NULL!	#NULL!	3	5	#NULL!	#NULL!	#NULL!
493	0	#NULL!	#NULL!	0	0	#NULL!	#NULL!	0	1	2	5	3	0	#NULL!	#NULL!	0	0	#NULL!	#NULL!	0	0	#NULL!	#NULL!	0	1	1	1	2	0	#NULL!	#NULL!	0	1	#NULL!	#NULL!	#NULL!	#NULL!	3	#NULL!	#NULL!	#NULL!	#NULL!	#NULL!	#NULL!	4	#NULL!	#NULL!	#NULL!	#NULL!
494	0	#NULL!	#NULL!	0	1	1	2	1	0	#NULL!	#NULL!	0	1	3	5	3	1	3	5	3	0	#NULL!	#NULL!	0	0	#NULL!	#NULL!	0	1	3	3	5	1	#NULL!	#NULL!	#NULL!	#NULL!	#NULL!	#NULL!	#NULL!	#NULL!	#NULL!	3	#NULL!	#NULL!	#NULL!	#NULL!	#NULL!	#NULL!
497	0	#NULL!	#NULL!	0	0	#NULL!	#NULL!	0	0	#NULL!	#NULL!	0	0	#NULL!	#NULL!	0	1	1	2	2	0	#NULL!	#NULL!	0	0	#NULL!	#NULL!	0	0	#NULL!	#NULL!	0	1	#NULL!	4	#NULL!	#NULL!	#NULL!	3	#NULL!	2	#NULL!	4	#NULL!	4	3	#NULL!	#NULL!	#NULL!
498	0	#NULL!	#NULL!	0	1	5	1000	5	0	#NULL!	#NULL!	0	0	#NULL!	#NULL!	0	1	3	3	4	1	4	10	4	1	1	1	4	0	#NULL!	#NULL!	0	3	3	4	#NULL!	#NULL!	#NULL!	#NULL!	#NULL!	#NULL!	#NULL!	#NULL!	#NULL!	#NULL!	#NULL!	#NULL!	#NULL!	#NULL!
499	0	#NULL!	#NULL!	0	0	#NULL!	#NULL!	0	0	#NULL!	#NULL!	0	0	#NULL!	#NULL!	0	1	1	3	2	0	#NULL!	#NULL!	0	1	1	2	2	0	#NULL!	#NULL!	0	4	#NULL!	3	#NULL!	#NULL!	5	#NULL!	#NULL!	#NULL!	#NULL!	2	4	#NULL!	5	#NULL!	#NULL!	#NULL!
501	0	#NULL!	#NULL!	0	0	#NULL!	#NULL!	0	0	#NULL!	#NULL!	0	0	#NULL!	#NULL!	0	0	#NULL!	#NULL!	0	0	#NULL!	#NULL!	0	0	#NULL!	#NULL!	0	0	#NULL!	#NULL!	0	2	#NULL!	#NULL!	#NULL!	#NULL!	4	#NULL!	#NULL!	5	#NULL!	#NULL!	#NULL!	3	3	#NULL!	#NULL!	#NULL!
502	0	#NULL!	#NULL!	0	0	#NULL!	#NULL!	0	0	#NULL!	#NULL!	0	1	1	0	1	1	2	5	1	0	#NULL!	#NULL!	0	1	1	3	3	0	#NULL!	#NULL!	0	1	3	#NULL!	#NULL!	#NULL!	#NULL!	#NULL!	#NULL!	#NULL!	#NULL!	#NULL!	#NULL!	1	#NULL!	1	#NULL!	#NULL!
503	0	#NULL!	#NULL!	0	1	2	10	2	0	#NULL!	#NULL!	0	0	#NULL!	#NULL!	0	1	1	1	2	0	#NULL!	#NULL!	0	1	2	3	2	1	1	1	1	1	2	4	#NULL!	#NULL!	3	2	#NULL!	#NULL!	#NULL!	3	4	#NULL!	3	5	#NULL!	#NULL!
505	1	1	5	3	1	5	100	5	0	#NULL!	#NULL!	0	0	#NULL!	#NULL!	0	1	3	6	5	1	3	12	5	1	3	6	5	0	#NULL!	#NULL!	0	5	5	5	5	5	5	#NULL!	#NULL!	5	5	5	5	5	5	#NULL!	5	#NULL!
508	0	#NULL!	#NULL!	0	0	#NULL!	#NULL!	0	0	#NULL!	#NULL!	0	0	#NULL!	#NULL!	0	0	#NULL!	#NULL!	0	1	2	1	4	0	#NULL!	#NULL!	0	0	#NULL!	#NULL!	0	1	#NULL!	5	#NULL!	#NULL!	#NULL!	5	#NULL!	1	#NULL!	#NULL!	#NULL!	#NULL!	#NULL!	1	#NULL!	#NULL!
511	1	1	2	1	1	1	5	2	1	1	1	1	0	#NULL!	#NULL!	0	1	1	1	2	0	#NULL!	#NULL!	0	1	3	6	5	0	#NULL!	#NULL!	0	3	#NULL!	4	#NULL!	#NULL!	4	#NULL!	#NULL!	#NULL!	#NULL!	5	#NULL!	5	1	#NULL!	#NULL!	#NULL!
518	0	#NULL!	#NULL!	0	0	#NULL!	#NULL!	0	0	#NULL!	#NULL!	0	0	#NULL!	#NULL!	0	1	2	10	3	1	1	2	4	1	1	1	5	0	#NULL!	#NULL!	0	3	3	2	2	#NULL!	#NULL!	3	#NULL!	3	#NULL!	3	#NULL!	4	5	#NULL!	#NULL!	#NULL!
521	0	#NULL!	#NULL!	0	0	#NULL!	#NULL!	0	0	#NULL!	#NULL!	0	0	#NULL!	#NULL!	0	1	1	2	2	0	#NULL!	#NULL!	0	0	#NULL!	#NULL!	0	0	#NULL!	#NULL!	0	2	#NULL!	5	#NULL!	#NULL!	#NULL!	#NULL!	#NULL!	1	#NULL!	#NULL!	#NULL!	1	1	5	#NULL!	#NULL!
525	0	#NULL!	#NULL!	0	0	#NULL!	#NULL!	0	0	#NULL!	#NULL!	0	0	#NULL!	#NULL!	0	0	#NULL!	#NULL!	0	1	1	2	3	0	#NULL!	#NULL!	0	1	1	1	2	2	#NULL!	#NULL!	#NULL!	#NULL!	#NULL!	#NULL!	#NULL!	4	#NULL!	#NULL!	#NULL!	4	4	#NULL!	#NULL!	#NULL!
526	0	#NULL!	#NULL!	0	1	5	50	4	0	#NULL!	#NULL!	0	0	#NULL!	#NULL!	0	1	2	4	2	1	2	3	2	1	2	3	4	0	#NULL!	#NULL!	0	4	4	4	3	#NULL!	4	4	#NULL!	3	2	3	2	4	4	#NULL!	3	#NULL!
529	0	#NULL!	#NULL!	0	0	#NULL!	#NULL!	0	0	#NULL!	#NULL!	0	0	#NULL!	#NULL!	0	0	#NULL!	#NULL!	0	0	#NULL!	#NULL!	0	0	#NULL!	#NULL!	0	0	#NULL!	#NULL!	0	1	#NULL!	5	#NULL!	#NULL!	#NULL!	#NULL!	5	2	#NULL!	#NULL!	#NULL!	#NULL!	5	#NULL!	#NULL!	#NULL!
530	0	#NULL!	#NULL!	0	1	5	20	4	0	#NULL!	#NULL!	0	0	#NULL!	#NULL!	0	0	#NULL!	#NULL!	0	1	1	1	4	0	#NULL!	#NULL!	0	0	#NULL!	#NULL!	0	3	#NULL!	2	4	#NULL!	2	5	#NULL!	#NULL!	#NULL!	5	2	5	4	#NULL!	2	#NULL!
531	0	#NULL!	#NULL!	0	1	2	3	2	0	#NULL!	#NULL!	0	0	#NULL!	#NULL!	0	1	2	3	2	0	#NULL!	#NULL!	0	1	4	10	4	0	#NULL!	#NULL!	0	1	5	3	5	3	5	5	3	5	2	4	5	3	5	1	3	1
533	1	1	2	3	1	2	4	2	0	#NULL!	#NULL!	0	0	#NULL!	#NULL!	0	1	4	20	5	1	2	3	5	1	3	15	5	0	#NULL!	#NULL!	0	5	4	5	#NULL!	#NULL!	5	5	#NULL!	5	3	5	5	5	5	#NULL!	5	#NULL!
535	0	#NULL!	#NULL!	0	1	1	3	1	0	#NULL!	#NULL!	0	0	#NULL!	#NULL!	0	1	3	20	3	0	#NULL!	#NULL!	0	1	1	2	4	0	#NULL!	#NULL!	0	1	#NULL!	2	#NULL!	#NULL!	#NULL!	#NULL!	#NULL!	3	#NULL!	#NULL!	#NULL!	#NULL!	2	#NULL!	#NULL!	#NULL!
539	0	#NULL!	#NULL!	0	0	#NULL!	#NULL!	0	0	#NULL!	#NULL!	0	0	#NULL!	#NULL!	0	0	#NULL!	#NULL!	0	1	2	5	2	0	#NULL!	#NULL!	0	0	#NULL!	#NULL!	0	1	#NULL!	#NULL!	#NULL!	#NULL!	1	#NULL!	#NULL!	#NULL!	#NULL!	5	#NULL!	5	#NULL!	#NULL!	#NULL!	#NULL!
541	1	2	2	1	1	2	3	1	0	#NULL!	#NULL!	0	0	#NULL!	#NULL!	0	1	1	1	5	0	#NULL!	#NULL!	0	0	#NULL!	#NULL!	0	0	#NULL!	#NULL!	0	3	3	4	#NULL!	#NULL!	3	#NULL!	#NULL!	2	1	3	#NULL!	#NULL!	2	#NULL!	#NULL!	#NULL!
545	0	#NULL!	#NULL!	0	1	2	50	2	0	#NULL!	#NULL!	0	0	#NULL!	#NULL!	0	1	3	20	4	1	1	2	2	1	1	3	5	0	#NULL!	#NULL!	0	1	#NULL!	#NULL!	#NULL!	#NULL!	#NULL!	#NULL!	#NULL!	#NULL!	#NULL!	#NULL!	#NULL!	#NULL!	#NULL!	#NULL!	#NULL!	#NULL!
547	1	3	20	4	1	3	20	4	1	4	20	4	0	#NULL!	#NULL!	0	1	4	10	4	1	3	5	3	1	4	10	3	0	#NULL!	#NULL!	0	4	5	5	5	#NULL!	5	#NULL!	#NULL!	5	2	5	1	#NULL!	5	#NULL!	1	1
549	0	#NULL!	#NULL!	0	1	1	2	1	0	#NULL!	#NULL!	0	0	#NULL!	#NULL!	0	0	#NULL!	#NULL!	0	1	1	1	1	0	#NULL!	#NULL!	0	1	3	3	3	3	3	3	2	2	4	4	#NULL!	1	#NULL!	2	#NULL!	4	#NULL!	#NULL!	2	#NULL!
552	0	#NULL!	#NULL!	0	1	2	5	2	0	#NULL!	#NULL!	0	0	#NULL!	#NULL!	0	0	#NULL!	#NULL!	0	1	1	2	1	0	#NULL!	#NULL!	0	0	#NULL!	#NULL!	0	1	#NULL!	#NULL!	#NULL!	#NULL!	#NULL!	#NULL!	#NULL!	3	#NULL!	#NULL!	#NULL!	3	#NULL!	#NULL!	#NULL!	#NULL!
556	1	2	2	4	1	1	1	1	1	1	1	1	1	3	10	3	1	5	10	5	0	#NULL!	#NULL!	0	1	2	3	3	1	5	10	5	1	#NULL!	#NULL!	#NULL!	#NULL!	#NULL!	#NULL!	#NULL!	#NULL!	#NULL!	#NULL!	#NULL!	#NULL!	#NULL!	#NULL!	#NULL!	#NULL!
557	0	#NULL!	#NULL!	0	1	2	10	2	1	2	8	4	0	#NULL!	#NULL!	0	1	2	2	3	0	#NULL!	#NULL!	0	1	3	6	4	0	#NULL!	#NULL!	0	3	1	4	3	#NULL!	4	#NULL!	#NULL!	#NULL!	#NULL!	#NULL!	2	#NULL!	5	#NULL!	#NULL!	#NULL!
558	1	1	3	1	1	4	30	4	0	#NULL!	#NULL!	0	0	#NULL!	#NULL!	0	1	2	2	2	0	#NULL!	#NULL!	0	1	1	1	3	0	#NULL!	#NULL!	0	1	#NULL!	#NULL!	#NULL!	#NULL!	5	#NULL!	#NULL!	5	#NULL!	5	#NULL!	5	5	#NULL!	#NULL!	#NULL!
559	1	1	1	4	1	5	30	5	0	#NULL!	#NULL!	0	0	#NULL!	#NULL!	0	1	2	3	5	0	#NULL!	#NULL!	0	1	1	2	5	1	1	2	5	5	3	5	5	#NULL!	5	#NULL!	1	4	#NULL!	5	#NULL!	5	5	5	5	#NULL!
560	0	#NULL!	#NULL!	0	0	#NULL!	#NULL!	0	0	#NULL!	#NULL!	0	0	#NULL!	#NULL!	0	1	2	10	4	0	#NULL!	#NULL!	0	1	2	2	4	0	#NULL!	#NULL!	0	4	#NULL!	#NULL!	#NULL!	#NULL!	5	#NULL!	#NULL!	3	#NULL!	5	#NULL!	5	3	#NULL!	#NULL!	#NULL!
564	0	#NULL!	#NULL!	0	0	#NULL!	#NULL!	0	0	#NULL!	#NULL!	0	0	#NULL!	#NULL!	0	1	2	2	3	1	2	3	3	1	1	1	3	0	#NULL!	#NULL!	0	1	1	2	#NULL!	3	#NULL!	#NULL!	#NULL!	4	2	#NULL!	#NULL!	#NULL!	3	#NULL!	2	#NULL!
566	0	#NULL!	#NULL!	0	1	1	5	2	0	#NULL!	#NULL!	0	0	#NULL!	#NULL!	0	1	3	8	3	1	2	2	2	0	#NULL!	#NULL!	0	0	#NULL!	#NULL!	0	5	4	4	4	4	5	5	#NULL!	5	4	5	4	5	5	#NULL!	5	#NULL!
567	1	1	1	1	1	4	10	5	0	#NULL!	#NULL!	0	0	#NULL!	#NULL!	0	1	2	2	5	0	#NULL!	#NULL!	0	0	#NULL!	#NULL!	0	0	#NULL!	#NULL!	0	2	3	4	2	2	4	4	#NULL!	4	1	5	#NULL!	2	#NULL!	#NULL!	2	#NULL!
573	0	#NULL!	#NULL!	0	1	2	15	2	0	#NULL!	#NULL!	0	0	#NULL!	#NULL!	0	1	1	5	1	1	2	10	2	0	#NULL!	#NULL!	0	0	#NULL!	#NULL!	0	1	2	3	#NULL!	#NULL!	4	#NULL!	#NULL!	4	#NULL!	4	2	5	5	#NULL!	2	2
574	0	#NULL!	#NULL!	0	1	2	2	2	0	#NULL!	#NULL!	0	0	#NULL!	#NULL!	0	0	#NULL!	#NULL!	0	1	1	1	1	0	#NULL!	#NULL!	0	0	#NULL!	#NULL!	0	3	5	5	5	#NULL!	2	#NULL!	1	3	#NULL!	2	4	1	5	#NULL!	#NULL!	#NULL!
578	0	#NULL!	#NULL!	0	1	2	5	1	0	#NULL!	#NULL!	0	0	#NULL!	#NULL!	0	1	2	7	3	1	3	10	3	0	#NULL!	#NULL!	0	0	#NULL!	#NULL!	0	2	#NULL!	1	1	1	2	#NULL!	#NULL!	1	#NULL!	3	#NULL!	2	1	#NULL!	#NULL!	#NULL!
582	0	#NULL!	#NULL!	0	0	#NULL!	#NULL!	0	0	#NULL!	#NULL!	0	0	#NULL!	#NULL!	0	1	1	2	1	1	1	1	1	0	#NULL!	#NULL!	0	0	#NULL!	#NULL!	0	2	2	#NULL!	3	#NULL!	5	4	#NULL!	1	1	4	4	3	1	#NULL!	#NULL!	#NULL!
583	0	#NULL!	#NULL!	0	1	3	30	3	0	#NULL!	#NULL!	0	0	#NULL!	#NULL!	0	0	#NULL!	#NULL!	0	0	#NULL!	#NULL!	0	0	#NULL!	#NULL!	0	0	#NULL!	#NULL!	0	1	#NULL!	#NULL!	#NULL!	#NULL!	#NULL!	#NULL!	#NULL!	1	#NULL!	1	#NULL!	#NULL!	3	#NULL!	#NULL!	#NULL!
584	0	#NULL!	#NULL!	0	1	1	3	2	0	#NULL!	#NULL!	0	0	#NULL!	#NULL!	0	1	3	15	4	1	3	5	3	1	1	1	3	0	#NULL!	#NULL!	0	5	5	5	#NULL!	#NULL!	5	5	5	5	3	5	2	4	5	5	3	#NULL!
585	0	#NULL!	#NULL!	0	0	#NULL!	#NULL!	0	0	#NULL!	#NULL!	0	0	#NULL!	#NULL!	0	1	2	5	1	0	#NULL!	#NULL!	0	1	3	10	3	0	#NULL!	#NULL!	0	4	5	3	4	4	5	#NULL!	4	5	4	#NULL!	4	#NULL!	4	#NULL!	4	4
588	0	#NULL!	#NULL!	0	1	2	5	2	0	#NULL!	#NULL!	0	1	4	45	3	1	2	15	3	0	#NULL!	#NULL!	0	0	#NULL!	#NULL!	0	0	#NULL!	#NULL!	0	1	3	4	#NULL!	#NULL!	2	#NULL!	#NULL!	5	4	#NULL!	#NULL!	#NULL!	2	#NULL!	5	#NULL!
590	0	#NULL!	#NULL!	0	1	1	1	2	0	#NULL!	#NULL!	0	0	#NULL!	#NULL!	0	1	3	5	4	0	#NULL!	#NULL!	0	1	3	5	4	0	#NULL!	#NULL!	0	3	1	3	1	#NULL!	5	2	#NULL!	4	#NULL!	4	5	5	5	#NULL!	4	#NULL!
591	0	#NULL!	#NULL!	0	0	#NULL!	#NULL!	0	0	#NULL!	#NULL!	0	0	#NULL!	#NULL!	0	0	#NULL!	#NULL!	0	0	#NULL!	#NULL!	0	0	#NULL!	#NULL!	0	0	#NULL!	#NULL!	0	3	#NULL!	5	5	#NULL!	5	5	#NULL!	5	#NULL!	5	#NULL!	#NULL!	5	5	#NULL!	#NULL!
593	1	3	100	4	0	#NULL!	#NULL!	0	0	#NULL!	#NULL!	0	1	5	150	4	1	2	5	2	1	2	5	2	0	#NULL!	#NULL!	0	0	#NULL!	#NULL!	0	5	5	5	5	#NULL!	5	5	#NULL!	#NULL!	#NULL!	5	#NULL!	#NULL!	#NULL!	#NULL!	#NULL!	#NULL!
595	0	#NULL!	#NULL!	0	0	#NULL!	#NULL!	0	0	#NULL!	#NULL!	0	0	#NULL!	#NULL!	0	1	1	2	2	1	2	2	3	1	2	1	3	1	1	1	2	3	#NULL!	#NULL!	#NULL!	#NULL!	#NULL!	#NULL!	#NULL!	5	1	3	#NULL!	5	5	#NULL!	#NULL!	#NULL!
597	0	#NULL!	#NULL!	0	1	1	2	1	0	#NULL!	#NULL!	0	0	#NULL!	#NULL!	0	1	1	3	2	0	#NULL!	#NULL!	0	0	#NULL!	#NULL!	0	0	#NULL!	#NULL!	0	2	#NULL!	#NULL!	#NULL!	#NULL!	5	5	#NULL!	3	#NULL!	#NULL!	#NULL!	5	2	#NULL!	#NULL!	#NULL!
598	0	#NULL!	#NULL!	0	0	#NULL!	#NULL!	0	0	#NULL!	#NULL!	0	0	#NULL!	#NULL!	0	0	#NULL!	#NULL!	0	0	#NULL!	#NULL!	0	0	#NULL!	#NULL!	0	0	#NULL!	#NULL!	0	3	#NULL!	4	#NULL!	#NULL!	1	#NULL!	4	5	#NULL!	#NULL!	#NULL!	1	3	#NULL!	1	#NULL!
599	0	#NULL!	#NULL!	0	1	5	30	4	0	#NULL!	#NULL!	0	0	#NULL!	#NULL!	0	0	#NULL!	#NULL!	0	0	#NULL!	#NULL!	0	1	1	2	1	0	#NULL!	#NULL!	0	2	1	#NULL!	#NULL!	#NULL!	1	#NULL!	#NULL!	2	#NULL!	2	2	5	5	#NULL!	#NULL!	#NULL!
603	1	1	2	2	1	3	7	3	0	#NULL!	#NULL!	0	0	#NULL!	#NULL!	0	1	2	2	3	1	4	6	5	0	#NULL!	#NULL!	0	0	#NULL!	#NULL!	0	3	#NULL!	5	#NULL!	#NULL!	2	5	#NULL!	#NULL!	#NULL!	2	#NULL!	5	#NULL!	#NULL!	#NULL!	#NULL!
605	0	#NULL!	#NULL!	0	1	1	2	2	0	#NULL!	#NULL!	0	0	#NULL!	#NULL!	0	1	3	5	5	0	#NULL!	#NULL!	0	1	1	1	4	0	#NULL!	#NULL!	0	4	1	4	#NULL!	4	5	5	#NULL!	#NULL!	4	5	#NULL!	5	2	#NULL!	#NULL!	#NULL!
606	0	#NULL!	#NULL!	0	1	3	20	2	1	2	3	3	0	#NULL!	#NULL!	0	1	3	8	3	0	#NULL!	#NULL!	0	0	#NULL!	#NULL!	0	0	#NULL!	#NULL!	0	3	3	2	4	3	3	4	#NULL!	4	#NULL!	5	4	5	4	#NULL!	#NULL!	#NULL!
607	0	#NULL!	#NULL!	0	1	1	5	1	0	#NULL!	#NULL!	0	0	#NULL!	#NULL!	0	1	2	10	3	0	#NULL!	#NULL!	0	1	1	2	3	1	1	1	4	3	3	5	#NULL!	#NULL!	5	#NULL!	#NULL!	1	#NULL!	#NULL!	#NULL!	3	5	#NULL!	#NULL!	#NULL!
608	1	1	1	2	0	#NULL!	#NULL!	0	1	2	4	2	0	#NULL!	#NULL!	0	1	1	2	3	0	#NULL!	#NULL!	0	0	#NULL!	#NULL!	0	0	#NULL!	#NULL!	0	1	#NULL!	#NULL!	#NULL!	#NULL!	#NULL!	#NULL!	#NULL!	#NULL!	#NULL!	#NULL!	#NULL!	4	2	#NULL!	#NULL!	#NULL!
609	0	#NULL!	#NULL!	0	0	#NULL!	#NULL!	0	0	#NULL!	#NULL!	0	0	#NULL!	#NULL!	0	0	#NULL!	#NULL!	0	0	#NULL!	#NULL!	0	0	#NULL!	#NULL!	0	0	#NULL!	#NULL!	0	2	3	3	#NULL!	#NULL!	5	#NULL!	#NULL!	3	#NULL!	4	#NULL!	5	5	5	#NULL!	#NULL!
612	0	#NULL!	#NULL!	0	0	#NULL!	#NULL!	0	0	#NULL!	#NULL!	0	0	#NULL!	#NULL!	0	1	3	2	2	1	4	3	3	1	4	5	4	1	2	1	2	3	#NULL!	4	#NULL!	#NULL!	3	#NULL!	5	#NULL!	#NULL!	#NULL!	4	5	5	#NULL!	#NULL!	#NULL!
613	1	2	300	2	0	#NULL!	#NULL!	0	0	#NULL!	#NULL!	0	0	#NULL!	#NULL!	0	1	4	50	4	1	4	30	4	1	1	3	4	1	2	4	4	3	2	2	#NULL!	1	#NULL!	#NULL!	#NULL!	1	#NULL!	#NULL!	#NULL!	2	#NULL!	#NULL!	1	1
616	1	2	5	3	1	2	10	3	0	#NULL!	#NULL!	0	0	#NULL!	#NULL!	0	1	4	35	2	1	2	6.5	2	1	2	4.5	4	0	#NULL!	#NULL!	0	3	5	3	3	5	4	4	#NULL!	5	5	2	2	4	5	#NULL!	4	#NULL!
621	0	#NULL!	#NULL!	0	0	#NULL!	#NULL!	0	0	#NULL!	#NULL!	0	0	#NULL!	#NULL!	0	1	3	10	2	1	3	3	2	0	#NULL!	#NULL!	0	1	3	5	2	1	4	4	3	5	5	#NULL!	#NULL!	2	#NULL!	3	4	3	#NULL!	#NULL!	#NULL!	1
625	1	1	15	1	1	1	20	1	0	#NULL!	#NULL!	0	0	#NULL!	#NULL!	0	1	2	50	3	1	2	40	3	1	1	20	2	1	3	100	3	3	4	4	3	3	4	2	#NULL!	2	1	3	2	3	3	1	3	#NULL!
627	0	#NULL!	#NULL!	0	1	1	1	1	0	#NULL!	#NULL!	0	0	#NULL!	#NULL!	0	1	3	3	2	0	#NULL!	#NULL!	0	0	#NULL!	#NULL!	0	0	#NULL!	#NULL!	0	2	#NULL!	3	#NULL!	#NULL!	#NULL!	4	5	#NULL!	#NULL!	5	#NULL!	3	2	3	#NULL!	#NULL!
630	0	#NULL!	#NULL!	0	1	4	40	5	0	#NULL!	#NULL!	0	0	#NULL!	#NULL!	0	1	2	4	1	1	2	2	1	1	2	2	2	0	#NULL!	#NULL!	0	1	#NULL!	2	#NULL!	#NULL!	#NULL!	#NULL!	#NULL!	#NULL!	#NULL!	#NULL!	#NULL!	3	#NULL!	#NULL!	#NULL!	#NULL!
633	0	#NULL!	#NULL!	0	0	#NULL!	#NULL!	0	0	#NULL!	#NULL!	0	0	#NULL!	#NULL!	0	1	3	30	3	1	2	3	3	1	1	2	4	0	#NULL!	#NULL!	0	5	4	3	2	2	4	#NULL!	#NULL!	5	#NULL!	2	2	5	4	#NULL!	5	#NULL!
635	0	#NULL!	#NULL!	0	0	#NULL!	#NULL!	0	0	#NULL!	#NULL!	0	0	#NULL!	#NULL!	0	1	4	20	4	1	4	20	4	1	4	20	4	0	#NULL!	#NULL!	0	5	1	#NULL!	#NULL!	#NULL!	5	#NULL!	#NULL!	5	#NULL!	1	1	5	5	#NULL!	5	1
636	1	3	100	2	0	#NULL!	#NULL!	0	0	#NULL!	#NULL!	0	0	#NULL!	#NULL!	0	1	3	20	4	0	#NULL!	#NULL!	0	1	2	5	4	1	2	2	4	4	5	5	2	#NULL!	5	5	#NULL!	5	5	5	3	5	5	#NULL!	#NULL!	#NULL!
638	1	2	3	2	1	2	5	2	0	#NULL!	#NULL!	0	0	#NULL!	#NULL!	0	1	3	15	5	0	#NULL!	#NULL!	0	1	1	1	3	0	#NULL!	#NULL!	0	5	3	4	#NULL!	#NULL!	3	3	#NULL!	#NULL!	#NULL!	4	2	2	5	#NULL!	2	#NULL!
639	0	#NULL!	#NULL!	0	0	#NULL!	#NULL!	0	0	#NULL!	#NULL!	0	0	#NULL!	#NULL!	0	1	2	2	2	0	#NULL!	#NULL!	0	1	3	3	3	0	#NULL!	#NULL!	0	1	3	2	#NULL!	#NULL!	#NULL!	5	#NULL!	#NULL!	#NULL!	4	3	#NULL!	5	#NULL!	#NULL!	#NULL!
640	1	1	3	1	1	4	100	4	1	3	5	5	1	5	100	3	1	2	2	3	0	#NULL!	#NULL!	0	0	#NULL!	#NULL!	0	0	#NULL!	#NULL!	0	1	4	4	3	2	3	#NULL!	#NULL!	1	1	#NULL!	2	3	4	5	2	#NULL!
642	0	#NULL!	#NULL!	0	0	#NULL!	#NULL!	0	0	#NULL!	#NULL!	0	0	#NULL!	#NULL!	0	0	#NULL!	#NULL!	0	1	2	1	1	0	#NULL!	#NULL!	0	1	1	2	2	3	3	4	#NULL!	#NULL!	#NULL!	3	#NULL!	4	#NULL!	3	#NULL!	5	5	#NULL!	#NULL!	#NULL!
643	0	#NULL!	#NULL!	0	1	3	25	2	0	#NULL!	#NULL!	0	0	#NULL!	#NULL!	0	1	4	20	2	0	#NULL!	#NULL!	0	1	1	6	4	0	#NULL!	#NULL!	0	2	3	3	3	#NULL!	3	#NULL!	#NULL!	3	3	2	3	5	4	#NULL!	4	#NULL!
644	0	#NULL!	#NULL!	0	1	3	30	1	0	#NULL!	#NULL!	0	0	#NULL!	#NULL!	0	1	2	10	2	1	2	10	2	1	3	15	2	0	#NULL!	#NULL!	0	1	1	1	1	1	3	5	#NULL!	#NULL!	#NULL!	5	5	5	3	#NULL!	5	#NULL!
651	0	#NULL!	#NULL!	0	0	#NULL!	#NULL!	0	0	#NULL!	#NULL!	0	0	#NULL!	#NULL!	0	1	2	3	1	0	#NULL!	#NULL!	0	1	2	2	3	0	#NULL!	#NULL!	0	3	#NULL!	#NULL!	#NULL!	#NULL!	#NULL!	#NULL!	#NULL!	#NULL!	#NULL!	#NULL!	#NULL!	5	5	4	#NULL!	#NULL!
654	1	2	2	1	1	2	5	1	0	#NULL!	#NULL!	0	0	#NULL!	#NULL!	0	0	#NULL!	#NULL!	0	0	#NULL!	#NULL!	0	1	5	4	3	0	#NULL!	#NULL!	0	3	3	3	2	4	4	4	#NULL!	2	#NULL!	4	3	4	4	#NULL!	#NULL!	#NULL!
655	0	#NULL!	#NULL!	0	1	1	3	1	0	#NULL!	#NULL!	0	0	#NULL!	#NULL!	0	1	2	10	3	0	#NULL!	#NULL!	0	0	#NULL!	#NULL!	0	0	#NULL!	#NULL!	0	4	#NULL!	4	4	#NULL!	4	4	#NULL!	3	2	5	2	5	1	1	4	1
657	0	#NULL!	#NULL!	0	0	#NULL!	#NULL!	0	0	#NULL!	#NULL!	0	0	#NULL!	#NULL!	0	1	3	5	5	1	2	2	3	1	1	2	5	0	#NULL!	#NULL!	0	1	5	5	5	1	5	#NULL!	#NULL!	5	5	5	5	#NULL!	5	#NULL!	5	#NULL!
658	1	1	25	1	0	#NULL!	#NULL!	0	0	#NULL!	#NULL!	0	0	#NULL!	#NULL!	0	1	2	30	2	1	1	4	5	1	1	2	5	0	#NULL!	#NULL!	0	4	3	4	#NULL!	4	4	#NULL!	#NULL!	5	5	#NULL!	4	4	5	#NULL!	5	#NULL!
659	0	#NULL!	#NULL!	0	1	1	1	3	0	#NULL!	#NULL!	0	0	#NULL!	#NULL!	0	1	1	1	3	1	3	2	2	1	1	1	4	0	#NULL!	#NULL!	0	2	2	4	1	1	3	2	1	2	1	3	3	3	3	1	1	1
677	0	#NULL!	#NULL!	0	0	#NULL!	#NULL!	0	0	#NULL!	#NULL!	0	0	#NULL!	#NULL!	0	1	2	5	2	0	#NULL!	#NULL!	0	1	1	1	2	1	3	3	2	3	#NULL!	#NULL!	#NULL!	#NULL!	4	4	#NULL!	#NULL!	#NULL!	3	#NULL!	3	5	#NULL!	#NULL!	#NULL!
678	0	#NULL!	#NULL!	0	1	1	2	1	0	#NULL!	#NULL!	0	0	#NULL!	#NULL!	0	1	2	5	3	0	#NULL!	#NULL!	0	0	#NULL!	#NULL!	0	0	#NULL!	#NULL!	3	2	3	#NULL!	#NULL!	#NULL!	#NULL!	#NULL!	#NULL!	3	#NULL!	4	#NULL!	4	5	#NULL!	#NULL!	#NULL!
679	0	#NULL!	#NULL!	0	1	2	2	1	0	#NULL!	#NULL!	0	0	#NULL!	#NULL!	0	0	#NULL!	#NULL!	0	0	#NULL!	#NULL!	0	0	#NULL!	#NULL!	0	0	#NULL!	#NULL!	0	2	#NULL!	1	#NULL!	#NULL!	3	4	#NULL!	#NULL!	#NULL!	#NULL!	#NULL!	4	#NULL!	#NULL!	#NULL!	#NULL!
685	0	#NULL!	#NULL!	0	1	3	16	2	0	#NULL!	#NULL!	0	0	#NULL!	#NULL!	0	1	2	4	2	1	2	3	2	1	2	2	2	0	#NULL!	#NULL!	0	3	4	4	#NULL!	#NULL!	4	#NULL!	#NULL!	2	2	4	#NULL!	2	4	#NULL!	#NULL!	#NULL!
686	0	#NULL!	#NULL!	0	1	2	3	2	0	#NULL!	#NULL!	0	0	#NULL!	#NULL!	0	1	2	5	2	0	#NULL!	#NULL!	0	1	4	10	4	0	#NULL!	#NULL!	0	2	2	1	#NULL!	3	2	#NULL!	#NULL!	2	#NULL!	1	#NULL!	2	1	#NULL!	#NULL!	1
687	0	#NULL!	#NULL!	0	1	1	2	2	0	#NULL!	#NULL!	0	0	#NULL!	#NULL!	0	0	#NULL!	#NULL!	0	0	#NULL!	#NULL!	0	1	4	10	4	0	#NULL!	#NULL!	0	3	4	5	#NULL!	#NULL!	3	3	5	3	#NULL!	3	#NULL!	5	5	#NULL!	#NULL!	#NULL!
689	0	#NULL!	#NULL!	0	0	#NULL!	#NULL!	0	0	#NULL!	#NULL!	0	0	#NULL!	#NULL!	0	1	1	1	3	1	2	1	2	0	#NULL!	#NULL!	0	0	#NULL!	#NULL!	0	1	#NULL!	#NULL!	#NULL!	#NULL!	#NULL!	#NULL!	#NULL!	#NULL!	#NULL!	#NULL!	#NULL!	#NULL!	#NULL!	#NULL!	#NULL!	#NULL!
691	0	#NULL!	#NULL!	0	0	#NULL!	#NULL!	0	0	#NULL!	#NULL!	0	0	#NULL!	#NULL!	0	1	2	5	2	1	3	10	3	0	#NULL!	#NULL!	0	0	#NULL!	#NULL!	0	2	#NULL!	#NULL!	#NULL!	#NULL!	#NULL!	#NULL!	#NULL!	4	#NULL!	#NULL!	#NULL!	#NULL!	#NULL!	#NULL!	#NULL!	#NULL!
694	1	3	100	4	1	2	6	2	0	#NULL!	#NULL!	0	0	#NULL!	#NULL!	0	1	3	5	5	1	3	3	4	1	4	6	5	1	3	3	4	5	5	5	5	5	5	5	5	5	5	5	5	5	5	5	5	5
695	0	#NULL!	#NULL!	0	0	#NULL!	#NULL!	0	1	2	30	1	0	#NULL!	#NULL!	0	1	2	10	2	1	1	2	1	1	1	3	2	0	#NULL!	#NULL!	0	4	4	4	2	2	#NULL!	4	#NULL!	5	5	1	2	#NULL!	5	2	1	#NULL!
699	0	#NULL!	#NULL!	0	0	#NULL!	#NULL!	0	0	#NULL!	#NULL!	0	0	#NULL!	#NULL!	0	1	3	4	4	1	4	10	5	1	1	2	4	0	#NULL!	#NULL!	0	1	4	2	#NULL!	#NULL!	#NULL!	2	#NULL!	4	#NULL!	#NULL!	#NULL!	#NULL!	1	#NULL!	#NULL!	#NULL!
701	0	#NULL!	#NULL!	0	1	4	50	4	0	#NULL!	#NULL!	0	0	#NULL!	#NULL!	0	1	4	6	4	1	3	5	4	1	4	10	3	0	#NULL!	#NULL!	0	5	5	4	#NULL!	#NULL!	5	#NULL!	4	5	5	#NULL!	5	5	5	#NULL!	#NULL!	#NULL!
703	0	#NULL!	#NULL!	0	1	2	2	2	0	#NULL!	#NULL!	0	0	#NULL!	#NULL!	0	0	#NULL!	#NULL!	0	0	#NULL!	#NULL!	0	0	#NULL!	#NULL!	0	0	#NULL!	#NULL!	0	4	#NULL!	#NULL!	#NULL!	#NULL!	2	#NULL!	#NULL!	2	#NULL!	2	#NULL!	2	2	#NULL!	#NULL!	#NULL!
704	0	#NULL!	#NULL!	0	0	#NULL!	#NULL!	0	0	#NULL!	#NULL!	0	0	#NULL!	#NULL!	0	1	3	15	4	1	4	10	4	0	#NULL!	#NULL!	0	0	#NULL!	#NULL!	0	3	2	2	1	#NULL!	#NULL!	#NULL!	#NULL!	4	3	2	#NULL!	#NULL!	3	#NULL!	#NULL!	#NULL!
706	0	#NULL!	#NULL!	0	1	4	20	3	0	#NULL!	#NULL!	0	0	#NULL!	#NULL!	0	1	3	10	3	1	3	5	3	0	#NULL!	#NULL!	0	0	#NULL!	#NULL!	0	1	3	#NULL!	3	#NULL!	3	#NULL!	#NULL!	2	#NULL!	4	#NULL!	4	#NULL!	#NULL!	#NULL!	#NULL!
708	0	#NULL!	#NULL!	0	1	1	4	1	0	#NULL!	#NULL!	0	0	#NULL!	#NULL!	0	1	2	5	3	0	#NULL!	#NULL!	0	0	#NULL!	#NULL!	0	0	#NULL!	#NULL!	0	3	2	#NULL!	#NULL!	#NULL!	4	#NULL!	#NULL!	#NULL!	#NULL!	4	3	3	3	4	#NULL!	#NULL!
711	0	#NULL!	#NULL!	0	1	1	3	1	0	#NULL!	#NULL!	0	0	#NULL!	#NULL!	0	1	3	10	2	1	4	15	3	0	#NULL!	#NULL!	0	0	#NULL!	#NULL!	0	1	#NULL!	1	3	#NULL!	#NULL!	#NULL!	#NULL!	#NULL!	#NULL!	2	2	4	1	#NULL!	#NULL!	#NULL!
713	0	#NULL!	#NULL!	0	1	4	100	4	0	#NULL!	#NULL!	0	0	#NULL!	#NULL!	0	1	1	2	2	1	2	2	2	0	#NULL!	#NULL!	0	0	#NULL!	#NULL!	0	1	#NULL!	#NULL!	#NULL!	#NULL!	#NULL!	#NULL!	#NULL!	2	#NULL!	#NULL!	#NULL!	#NULL!	2	#NULL!	#NULL!	#NULL!
718	0	#NULL!	#NULL!	0	1	2	10	2	0	#NULL!	#NULL!	0	0	#NULL!	#NULL!	0	1	1	5	1	0	#NULL!	#NULL!	0	0	#NULL!	#NULL!	0	0	#NULL!	#NULL!	0	2	3	1	1	4	1	#NULL!	#NULL!	#NULL!	1	1	2	4	3	4	#NULL!	#NULL!
719	0	#NULL!	#NULL!	0	1	3	6	1	0	#NULL!	#NULL!	0	0	#NULL!	#NULL!	0	1	1	2	2	1	3	5	1	0	#NULL!	#NULL!	0	0	#NULL!	#NULL!	0	3	3	#NULL!	2	#NULL!	3	#NULL!	#NULL!	5	2	4	#NULL!	#NULL!	3	#NULL!	#NULL!	#NULL!
722	0	#NULL!	#NULL!	0	1	2	7	3	0	#NULL!	#NULL!	0	0	#NULL!	#NULL!	0	1	1	2	3	1	2	4	3	1	1	1	1	0	#NULL!	#NULL!	0	2	2	2	#NULL!	#NULL!	#NULL!	#NULL!	#NULL!	3	#NULL!	#NULL!	#NULL!	2	3	#NULL!	#NULL!	#NULL!
724	0	#NULL!	#NULL!	0	0	#NULL!	#NULL!	0	0	#NULL!	#NULL!	0	0	#NULL!	#NULL!	0	1	1	2	2	1	2	7	2	0	#NULL!	#NULL!	0	0	#NULL!	#NULL!	0	2	#NULL!	#NULL!	#NULL!	#NULL!	#NULL!	1	#NULL!	2	#NULL!	#NULL!	#NULL!	2	#NULL!	#NULL!	#NULL!	#NULL!
726	1	1	1	1	1	5	5000	5	0	#NULL!	#NULL!	0	0	#NULL!	#NULL!	0	1	4	50	3	1	2	3	3	1	3	10	4	0	#NULL!	#NULL!	0	5	5	5	5	5	3	3	2	5	5	5	3	1	5	1	5	1
728	0	#NULL!	#NULL!	0	1	1	2	2	0	#NULL!	#NULL!	0	0	#NULL!	#NULL!	0	1	3	7	2	1	1	2	1	0	#NULL!	#NULL!	0	0	#NULL!	#NULL!	0	4	3	4	#NULL!	#NULL!	4	#NULL!	2	#NULL!	2	3	4	5	5	3	#NULL!	#NULL!
729	0	#NULL!	#NULL!	0	0	#NULL!	#NULL!	0	0	#NULL!	#NULL!	0	0	#NULL!	#NULL!	0	1	1	4	1	0	#NULL!	#NULL!	0	0	#NULL!	#NULL!	0	0	#NULL!	#NULL!	0	2	#NULL!	1	#NULL!	#NULL!	3	#NULL!	#NULL!	#NULL!	#NULL!	#NULL!	#NULL!	#NULL!	#NULL!	#NULL!	#NULL!	#NULL!
730	0	#NULL!	#NULL!	0	0	#NULL!	#NULL!	0	0	#NULL!	#NULL!	0	0	#NULL!	#NULL!	0	1	2	3	2	0	#NULL!	#NULL!	0	1	2	2	3	0	#NULL!	#NULL!	0	3	4	#NULL!	4	#NULL!	4	4	#NULL!	5	#NULL!	5	5	5	5	#NULL!	3	#NULL!
736	0	#NULL!	#NULL!	0	1	3	12	3	1	1	1	2	0	#NULL!	#NULL!	0	1	2	3	4	1	2	2	3	1	2	1	5	0	#NULL!	#NULL!	0	5	5	5	2	#NULL!	5	5	#NULL!	4	#NULL!	5	3	3	5	#NULL!	4	#NULL!
739	0	#NULL!	#NULL!	0	1	2	2	2	0	#NULL!	#NULL!	0	0	#NULL!	#NULL!	0	0	#NULL!	#NULL!	0	0	#NULL!	#NULL!	0	0	#NULL!	#NULL!	0	0	#NULL!	#NULL!	0	3	3	3	#NULL!	3	5	5	#NULL!	2	#NULL!	2	#NULL!	5	5	3	3	#NULL!
742	0	#NULL!	#NULL!	0	1	1	2	1	0	#NULL!	#NULL!	0	0	#NULL!	#NULL!	0	1	2	5	2	1	1	1	1	1	2	3	2	0	#NULL!	#NULL!	0	3	#NULL!	#NULL!	#NULL!	#NULL!	#NULL!	3	#NULL!	#NULL!	#NULL!	3	#NULL!	#NULL!	5	#NULL!	#NULL!	#NULL!
743	0	#NULL!	#NULL!	0	1	1	1	1	0	#NULL!	#NULL!	0	0	#NULL!	#NULL!	0	1	4	20	4	1	3	5	3	1	2	1	5	0	#NULL!	#NULL!	0	4	#NULL!	3	#NULL!	#NULL!	3	2	#NULL!	#NULL!	#NULL!	3	3	5	#NULL!	#NULL!	#NULL!	#NULL!
745	0	#NULL!	#NULL!	0	0	#NULL!	#NULL!	0	1	1	1	1	0	#NULL!	#NULL!	0	1	2	2	3	0	#NULL!	#NULL!	0	0	#NULL!	#NULL!	0	0	#NULL!	#NULL!	0	2	3	3	#NULL!	#NULL!	5	5	#NULL!	#NULL!	#NULL!	4	#NULL!	#NULL!	#NULL!	#NULL!	#NULL!	#NULL!
746	0	#NULL!	#NULL!	0	1	1	1	1	0	#NULL!	#NULL!	0	0	#NULL!	#NULL!	0	0	#NULL!	#NULL!	0	0	#NULL!	#NULL!	0	0	#NULL!	#NULL!	0	0	#NULL!	#NULL!	0	1	#NULL!	#NULL!	#NULL!	#NULL!	#NULL!	#NULL!	#NULL!	#NULL!	#NULL!	#NULL!	#NULL!	#NULL!	#NULL!	#NULL!	#NULL!	#NULL!
751	0	#NULL!	#NULL!	0	1	2	6	1	0	#NULL!	#NULL!	0	0	#NULL!	#NULL!	0	1	2	2	1	0	#NULL!	#NULL!	0	1	5	7	5	1	3	2	4	3	#NULL!	#NULL!	#NULL!	#NULL!	5	#NULL!	#NULL!	#NULL!	#NULL!	#NULL!	#NULL!	#NULL!	#NULL!	#NULL!	#NULL!	#NULL!
753	0	#NULL!	#NULL!	0	0	#NULL!	#NULL!	0	0	#NULL!	#NULL!	0	0	#NULL!	#NULL!	0	1	2	2	3	1	3	4	3	0	#NULL!	#NULL!	0	0	#NULL!	#NULL!	0	1	#NULL!	#NULL!	#NULL!	1	#NULL!	#NULL!	#NULL!	#NULL!	#NULL!	#NULL!	#NULL!	3	#NULL!	#NULL!	#NULL!	#NULL!
756	1	1	2	2	1	2	5	3	0	#NULL!	#NULL!	0	0	#NULL!	#NULL!	0	1	3	6	4	1	1	2	3	1	2	3	4	0	#NULL!	#NULL!	0	2	3	1	1	#NULL!	4	2	#NULL!	2	#NULL!	5	#NULL!	5	3	#NULL!	#NULL!	1
759	0	#NULL!	#NULL!	0	1	5	1000	4	0	#NULL!	#NULL!	0	0	#NULL!	#NULL!	0	1	1	3	1	1	4	20	2	0	#NULL!	#NULL!	0	0	#NULL!	#NULL!	0	2	#NULL!	4	#NULL!	#NULL!	2	4	5	#NULL!	#NULL!	#NULL!	2	5	5	4	3	#NULL!
760	0	#NULL!	#NULL!	0	0	#NULL!	#NULL!	0	0	#NULL!	#NULL!	0	0	#NULL!	#NULL!	0	0	#NULL!	#NULL!	0	0	#NULL!	#NULL!	0	0	#NULL!	#NULL!	0	0	#NULL!	#NULL!	0	1	4	#NULL!	#NULL!	#NULL!	#NULL!	#NULL!	#NULL!	#NULL!	#NULL!	4	#NULL!	#NULL!	4	#NULL!	#NULL!	#NULL!
764	0	#NULL!	#NULL!	0	1	5	20	5	0	#NULL!	#NULL!	0	0	#NULL!	#NULL!	0	0	#NULL!	#NULL!	0	0	#NULL!	#NULL!	0	0	#NULL!	#NULL!	0	0	#NULL!	#NULL!	0	1	#NULL!	2	#NULL!	#NULL!	3	#NULL!	#NULL!	3	#NULL!	#NULL!	#NULL!	4	2	#NULL!	#NULL!	#NULL!
766	0	#NULL!	#NULL!	0	1	4	50	3	1	1	2	3	0	#NULL!	#NULL!	0	1	3	7	2	1	2	3	3	1	4	15	4	0	#NULL!	#NULL!	0	5	1	4	5	3	5	#NULL!	#NULL!	5	5	1	4	5	5	2	2	1
767	0	#NULL!	#NULL!	0	0	#NULL!	#NULL!	0	0	#NULL!	#NULL!	0	0	#NULL!	#NULL!	0	1	3	3	3	1	2	1	4	0	#NULL!	#NULL!	0	0	#NULL!	#NULL!	0	1	5	5	#NULL!	#NULL!	5	#NULL!	#NULL!	#NULL!	#NULL!	5	#NULL!	5	5	#NULL!	5	#NULL!
768	0	#NULL!	#NULL!	0	0	#NULL!	#NULL!	0	0	#NULL!	#NULL!	0	0	#NULL!	#NULL!	0	1	1	2	1	0	#NULL!	#NULL!	0	0	#NULL!	#NULL!	0	1	1	1	2	3	#NULL!	#NULL!	#NULL!	#NULL!	5	#NULL!	#NULL!	#NULL!	#NULL!	#NULL!	#NULL!	#NULL!	3	#NULL!	#NULL!	#NULL!
769	0	#NULL!	#NULL!	0	1	1	1	1	0	#NULL!	#NULL!	0	1	1	3	2	0	#NULL!	#NULL!	0	0	#NULL!	#NULL!	0	0	#NULL!	#NULL!	0	0	#NULL!	#NULL!	0	1	#NULL!	#NULL!	#NULL!	#NULL!	#NULL!	#NULL!	#NULL!	1	#NULL!	1	#NULL!	2	1	#NULL!	#NULL!	#NULL!
770	0	#NULL!	#NULL!	0	1	3	15	2	0	#NULL!	#NULL!	0	0	#NULL!	#NULL!	0	0	#NULL!	#NULL!	0	0	#NULL!	#NULL!	0	0	#NULL!	#NULL!	0	0	#NULL!	#NULL!	0	2	#NULL!	#NULL!	#NULL!	#NULL!	#NULL!	#NULL!	#NULL!	#NULL!	#NULL!	#NULL!	#NULL!	#NULL!	#NULL!	#NULL!	#NULL!	#NULL!
772	0	#NULL!	#NULL!	0	1	1	2	1	0	#NULL!	#NULL!	0	0	#NULL!	#NULL!	0	1	1	1	3	0	#NULL!	#NULL!	0	0	#NULL!	#NULL!	0	0	#NULL!	#NULL!	0	3	5	5	5	2	5	#NULL!	3	5	5	5	5	5	5	#NULL!	5	#NULL!
775	1	1	2	2	1	1	2	1	0	#NULL!	#NULL!	0	0	#NULL!	#NULL!	0	1	2	7	3	0	#NULL!	#NULL!	0	1	4	15	4	1	4	10	5	5	2	5	5	3	4	3	5	3	5	3	3	1	5	5	2	1
779	0	#NULL!	#NULL!	0	1	2	5	2	0	#NULL!	#NULL!	0	0	#NULL!	#NULL!	0	0	#NULL!	#NULL!	0	0	#NULL!	#NULL!	0	0	#NULL!	#NULL!	0	0	#NULL!	#NULL!	0	2	#NULL!	#NULL!	#NULL!	#NULL!	5	#NULL!	#NULL!	#NULL!	#NULL!	4	#NULL!	2	1	#NULL!	#NULL!	#NULL!
781	1	1	2	1	1	1	1	3	0	#NULL!	#NULL!	0	1	2	2	4	1	3	6	5	0	#NULL!	#NULL!	0	1	1	2	5	1	3	10	5	4	#NULL!	4	4	5	5	#NULL!	#NULL!	5	3	4	5	#NULL!	5	#NULL!	#NULL!	4
782	0	#NULL!	#NULL!	0	0	#NULL!	#NULL!	0	1	1	1	1	0	#NULL!	#NULL!	0	1	1	3	2	1	1	1	1	0	#NULL!	#NULL!	0	0	#NULL!	#NULL!	0	4	#NULL!	#NULL!	#NULL!	#NULL!	4	#NULL!	#NULL!	#NULL!	#NULL!	#NULL!	#NULL!	4	#NULL!	#NULL!	4	#NULL!
783	0	#NULL!	#NULL!	0	0	#NULL!	#NULL!	0	0	#NULL!	#NULL!	0	0	#NULL!	#NULL!	0	0	#NULL!	#NULL!	0	0	#NULL!	#NULL!	0	0	#NULL!	#NULL!	0	0	#NULL!	#NULL!	0	2	#NULL!	#NULL!	#NULL!	#NULL!	#NULL!	#NULL!	#NULL!	#NULL!	#NULL!	#NULL!	#NULL!	3	#NULL!	3	#NULL!	#NULL!
786	1	1	2	3	1	2	5	2	0	#NULL!	#NULL!	0	1	1	1	4	1	2	4	1	0	#NULL!	#NULL!	0	0	#NULL!	#NULL!	0	0	#NULL!	#NULL!	0	3	4	4	4	#NULL!	4	3	#NULL!	4	#NULL!	#NULL!	#NULL!	5	5	#NULL!	#NULL!	#NULL!
787	1	1	3	2	1	3	5	1	0	#NULL!	#NULL!	0	0	#NULL!	#NULL!	0	1	2	2	3	1	1	1	1	0	#NULL!	#NULL!	0	0	#NULL!	#NULL!	0	4	3	2	5	3	1	5	#NULL!	3	1	4	#NULL!	3	5	#NULL!	5	#NULL!
791	0	#NULL!	#NULL!	0	1	1	1	1	0	#NULL!	#NULL!	0	0	#NULL!	#NULL!	0	0	#NULL!	#NULL!	0	0	#NULL!	#NULL!	0	0	#NULL!	#NULL!	0	0	#NULL!	#NULL!	0	3	#NULL!	#NULL!	#NULL!	#NULL!	#NULL!	#NULL!	#NULL!	#NULL!	#NULL!	#NULL!	#NULL!	#NULL!	5	#NULL!	#NULL!	#NULL!
793	0	#NULL!	#NULL!	0	0	#NULL!	#NULL!	0	0	#NULL!	#NULL!	0	0	#NULL!	#NULL!	0	0	#NULL!	#NULL!	0	0	#NULL!	#NULL!	0	0	#NULL!	#NULL!	0	0	#NULL!	#NULL!	0	1	#NULL!	#NULL!	#NULL!	#NULL!	#NULL!	#NULL!	#NULL!	1	#NULL!	#NULL!	#NULL!	1	#NULL!	#NULL!	#NULL!	#NULL!
794	0	#NULL!	#NULL!	0	0	#NULL!	#NULL!	0	0	#NULL!	#NULL!	0	0	#NULL!	#NULL!	0	1	1	2	2	0	#NULL!	#NULL!	0	1	1	1	5	0	#NULL!	#NULL!	0	3	#NULL!	3	#NULL!	#NULL!	#NULL!	5	#NULL!	#NULL!	#NULL!	#NULL!	#NULL!	#NULL!	5	#NULL!	2	#NULL!
795	0	#NULL!	#NULL!	0	1	2	15	1	0	#NULL!	#NULL!	0	0	#NULL!	#NULL!	0	1	2	8	3	0	#NULL!	#NULL!	0	1	1	1	4	0	#NULL!	#NULL!	0	1	3	5	#NULL!	#NULL!	#NULL!	#NULL!	#NULL!	3	#NULL!	2	#NULL!	#NULL!	5	#NULL!	#NULL!	#NULL!
797	0	#NULL!	#NULL!	0	1	3	2	2	0	#NULL!	#NULL!	0	0	#NULL!	#NULL!	0	1	4	10	5	0	#NULL!	#NULL!	0	1	3	5	3	0	#NULL!	#NULL!	0	2	4	4	2	#NULL!	4	#NULL!	#NULL!	#NULL!	#NULL!	4	#NULL!	#NULL!	5	#NULL!	5	#NULL!
802	0	#NULL!	#NULL!	0	1	1	8	2	0	#NULL!	#NULL!	0	1	1	8	1	1	3	15	2	1	1	5	1	1	1	1	4	0	#NULL!	#NULL!	0	3	5	3	#NULL!	#NULL!	#NULL!	2	#NULL!	4	#NULL!	5	#NULL!	5	3	#NULL!	5	#NULL!
805	0	#NULL!	#NULL!	0	1	4	7	1	0	#NULL!	#NULL!	0	0	#NULL!	#NULL!	0	1	3	2	2	1	3	1	2	0	#NULL!	#NULL!	0	0	#NULL!	#NULL!	0	2	#NULL!	#NULL!	#NULL!	#NULL!	#NULL!	#NULL!	#NULL!	#NULL!	#NULL!	#NULL!	#NULL!	5	5	2	1	1
806	0	#NULL!	#NULL!	0	1	5	100	5	0	#NULL!	#NULL!	0	0	#NULL!	#NULL!	0	1	2	3	2	1	1	2	4	0	#NULL!	#NULL!	0	0	#NULL!	#NULL!	0	3	2	5	3	#NULL!	5	5	#NULL!	4	1	3	#NULL!	#NULL!	5	#NULL!	#NULL!	#NULL!
809	1	1	7	2	1	4	50	4	0	#NULL!	#NULL!	0	0	#NULL!	#NULL!	0	1	4	5	4	0	#NULL!	#NULL!	0	1	3	2	4	1	2	1	4	4	5	5	5	5	5	1	5	5	5	5	5	5	5	3	5	5
810	0	#NULL!	#NULL!	0	1	5	50	4	0	#NULL!	#NULL!	0	0	#NULL!	#NULL!	0	1	1	2	2	0	#NULL!	#NULL!	0	0	#NULL!	#NULL!	0	0	#NULL!	#NULL!	0	2	#NULL!	#NULL!	#NULL!	#NULL!	#NULL!	#NULL!	#NULL!	2	#NULL!	#NULL!	#NULL!	#NULL!	#NULL!	#NULL!	#NULL!	#NULL!
811	0	#NULL!	#NULL!	0	1	2	15	4	0	#NULL!	#NULL!	0	1	3	30	4	1	5	20	5	1	3	15	2	1	2	18	4	1	5	25	5	5	4	5	3	5	5	#NULL!	1	#NULL!	#NULL!	4	5	5	5	5	3	#NULL!
814	0	#NULL!	#NULL!	0	0	#NULL!	#NULL!	0	0	#NULL!	#NULL!	0	0	#NULL!	#NULL!	0	1	3	10	2	0	#NULL!	#NULL!	0	0	#NULL!	#NULL!	0	1	2	2	3	3	4	1	3	3	5	3	#NULL!	4	3	4	3	4	4	4	4	#NULL!
816	0	#NULL!	#NULL!	0	0	#NULL!	#NULL!	0	0	#NULL!	#NULL!	0	0	#NULL!	#NULL!	0	0	#NULL!	#NULL!	0	0	#NULL!	#NULL!	0	0	#NULL!	#NULL!	0	0	#NULL!	#NULL!	0	2	#NULL!	1	#NULL!	#NULL!	#NULL!	#NULL!	#NULL!	1	#NULL!	2	#NULL!	#NULL!	4	#NULL!	#NULL!	#NULL!
817	0	#NULL!	#NULL!	0	1	3	15	4	0	#NULL!	#NULL!	0	0	#NULL!	#NULL!	0	1	4	20	2	1	2	5	3	0	#NULL!	#NULL!	0	0	#NULL!	#NULL!	0	3	4	3	#NULL!	#NULL!	5	#NULL!	#NULL!	2	1	5	4	5	3	#NULL!	#NULL!	#NULL!
818	0	#NULL!	#NULL!	0	1	1	3	1	0	#NULL!	#NULL!	0	0	#NULL!	#NULL!	0	0	#NULL!	#NULL!	0	0	#NULL!	#NULL!	0	0	#NULL!	#NULL!	0	0	#NULL!	#NULL!	0	1	3	#NULL!	#NULL!	#NULL!	#NULL!	#NULL!	#NULL!	#NULL!	#NULL!	#NULL!	#NULL!	#NULL!	#NULL!	#NULL!	#NULL!	#NULL!
820	0	#NULL!	#NULL!	0	1	1	2	1	0	#NULL!	#NULL!	0	0	#NULL!	#NULL!	0	0	#NULL!	#NULL!	0	0	#NULL!	#NULL!	0	0	#NULL!	#NULL!	0	0	#NULL!	#NULL!	0	1	#NULL!	#NULL!	#NULL!	#NULL!	#NULL!	#NULL!	#NULL!	1	#NULL!	#NULL!	#NULL!	1	2	#NULL!	2	#NULL!
822	0	#NULL!	#NULL!	0	0	#NULL!	#NULL!	0	0	#NULL!	#NULL!	0	0	#NULL!	#NULL!	0	1	2	3	2	1	1	1	1	1	2	2	3	0	#NULL!	#NULL!	0	3	#NULL!	4	#NULL!	#NULL!	5	#NULL!	#NULL!	5	#NULL!	#NULL!	4	5	#NULL!	#NULL!	4	#NULL!
823	0	#NULL!	#NULL!	0	1	1	5	1	0	#NULL!	#NULL!	0	0	#NULL!	#NULL!	0	0	#NULL!	#NULL!	0	0	#NULL!	#NULL!	0	0	#NULL!	#NULL!	0	0	#NULL!	#NULL!	0	1	#NULL!	1	#NULL!	#NULL!	#NULL!	1	#NULL!	#NULL!	#NULL!	1	#NULL!	1	#NULL!	#NULL!	#NULL!	#NULL!
824	0	#NULL!	#NULL!	0	0	#NULL!	#NULL!	0	0	#NULL!	#NULL!	0	0	#NULL!	#NULL!	0	0	#NULL!	#NULL!	0	1	1	1	1	0	#NULL!	#NULL!	0	0	#NULL!	#NULL!	0	1	3	2	2	#NULL!	#NULL!	#NULL!	#NULL!	#NULL!	#NULL!	2	#NULL!	#NULL!	3	#NULL!	#NULL!	#NULL!
825	0	#NULL!	#NULL!	0	1	5	500	4	0	#NULL!	#NULL!	0	0	#NULL!	#NULL!	0	1	1	2	3	0	#NULL!	#NULL!	0	0	#NULL!	#NULL!	0	0	#NULL!	#NULL!	0	2	#NULL!	#NULL!	3	#NULL!	#NULL!	#NULL!	#NULL!	#NULL!	#NULL!	2	#NULL!	5	#NULL!	#NULL!	#NULL!	#NULL!
826	0	#NULL!	#NULL!	0	0	#NULL!	#NULL!	0	0	#NULL!	#NULL!	0	0	#NULL!	#NULL!	0	1	1	2	1	1	1	2	1	0	#NULL!	#NULL!	0	0	#NULL!	#NULL!	0	1	#NULL!	#NULL!	#NULL!	#NULL!	#NULL!	#NULL!	#NULL!	#NULL!	#NULL!	#NULL!	#NULL!	#NULL!	#NULL!	#NULL!	#NULL!	#NULL!
827	1	1	2	1	1	2	5	2	0	#NULL!	#NULL!	0	0	#NULL!	#NULL!	0	1	3	25	4	0	#NULL!	#NULL!	0	1	1	2	5	0	#NULL!	#NULL!	0	1	#NULL!	#NULL!	2	#NULL!	#NULL!	#NULL!	#NULL!	3	#NULL!	#NULL!	#NULL!	#NULL!	#NULL!	#NULL!	#NULL!	#NULL!
830	0	#NULL!	#NULL!	0	0	#NULL!	#NULL!	0	0	#NULL!	#NULL!	0	0	#NULL!	#NULL!	0	1	2	1	2	0	#NULL!	#NULL!	0	1	1	1	1	0	#NULL!	#NULL!	0	3	3	1	2	#NULL!	4	#NULL!	5	4	2	4	5	5	4	#NULL!	4	#NULL!
831	0	#NULL!	#NULL!	0	0	#NULL!	#NULL!	0	0	#NULL!	#NULL!	0	0	#NULL!	#NULL!	0	1	3	15	4	1	4	8	4	1	2	3	4	1	3	10	3	4	2	2	#NULL!	3	3	3	#NULL!	4	#NULL!	1	3	5	4	#NULL!	3	#NULL!
832	0	#NULL!	#NULL!	0	0	#NULL!	#NULL!	0	0	#NULL!	#NULL!	0	0	#NULL!	#NULL!	0	0	#NULL!	#NULL!	0	0	#NULL!	#NULL!	0	1	2	4	2	1	2	6	2	2	#NULL!	#NULL!	#NULL!	#NULL!	#NULL!	2	#NULL!	#NULL!	#NULL!	#NULL!	#NULL!	2	#NULL!	#NULL!	#NULL!	#NULL!
834	0	#NULL!	#NULL!	0	1	2	10	2	0	#NULL!	#NULL!	0	0	#NULL!	#NULL!	0	0	#NULL!	#NULL!	0	0	#NULL!	#NULL!	0	0	#NULL!	#NULL!	0	0	#NULL!	#NULL!	0	1	#NULL!	#NULL!	#NULL!	#NULL!	#NULL!	#NULL!	#NULL!	#NULL!	#NULL!	#NULL!	#NULL!	#NULL!	#NULL!	#NULL!	#NULL!	#NULL!
835	0	#NULL!	#NULL!	0	0	#NULL!	#NULL!	0	0	#NULL!	#NULL!	0	0	#NULL!	#NULL!	0	1	2	2	3	0	#NULL!	#NULL!	0	0	#NULL!	#NULL!	0	0	#NULL!	#NULL!	0	3	#NULL!	5	#NULL!	#NULL!	3	#NULL!	#NULL!	#NULL!	#NULL!	#NULL!	2	2	#NULL!	#NULL!	#NULL!	#NULL!
836	0	#NULL!	#NULL!	0	1	3	7	2	0	#NULL!	#NULL!	0	0	#NULL!	#NULL!	0	0	#NULL!	#NULL!	0	0	#NULL!	#NULL!	0	0	#NULL!	#NULL!	0	0	#NULL!	#NULL!	0	4	5	5	4	3	4	3	2	4	3	4	#NULL!	3	4	3	3	#NULL!
837	0	#NULL!	#NULL!	0	0	#NULL!	#NULL!	0	0	#NULL!	#NULL!	0	0	#NULL!	#NULL!	0	1	1	2	2	1	1	2	2	1	1	1	4	0	#NULL!	#NULL!	0	4	3	#NULL!	#NULL!	#NULL!	3	5	#NULL!	3	#NULL!	4	#NULL!	5	5	#NULL!	#NULL!	#NULL!
840	1	2	10	2	1	1	1	1	0	#NULL!	#NULL!	0	0	#NULL!	#NULL!	0	0	#NULL!	#NULL!	0	0	#NULL!	#NULL!	0	0	#NULL!	#NULL!	0	0	#NULL!	#NULL!	0	3	1	5	1	#NULL!	3	#NULL!	#NULL!	#NULL!	#NULL!	3	#NULL!	5	5	#NULL!	2	#NULL!
844	0	#NULL!	#NULL!	0	0	#NULL!	#NULL!	0	0	#NULL!	#NULL!	0	0	#NULL!	#NULL!	0	0	#NULL!	#NULL!	0	0	#NULL!	#NULL!	0	1	2	2	3	0	#NULL!	#NULL!	0	3	#NULL!	#NULL!	#NULL!	#NULL!	4	3	#NULL!	#NULL!	#NULL!	#NULL!	4	1	4	#NULL!	#NULL!	#NULL!
845	0	#NULL!	#NULL!	0	0	#NULL!	#NULL!	0	0	#NULL!	#NULL!	0	0	#NULL!	#NULL!	0	0	#NULL!	#NULL!	0	0	#NULL!	#NULL!	0	0	#NULL!	#NULL!	0	0	#NULL!	#NULL!	0	2	4	#NULL!	#NULL!	#NULL!	#NULL!	#NULL!	5	#NULL!	#NULL!	#NULL!	#NULL!	#NULL!	5	#NULL!	#NULL!	#NULL!
846	0	#NULL!	#NULL!	0	0	#NULL!	#NULL!	0	0	#NULL!	#NULL!	0	0	#NULL!	#NULL!	0	0	#NULL!	#NULL!	0	0	#NULL!	#NULL!	0	1	1	1	1	0	#NULL!	#NULL!	0	2	#NULL!	2	#NULL!	#NULL!	#NULL!	#NULL!	2	#NULL!	#NULL!	3	#NULL!	4	4	#NULL!	#NULL!	#NULL!
848	0	#NULL!	#NULL!	0	1	4	100	4	0	#NULL!	#NULL!	0	0	#NULL!	#NULL!	0	1	1	1	2	1	2	1	2	0	#NULL!	#NULL!	0	0	#NULL!	#NULL!	0	4	4	#NULL!	#NULL!	#NULL!	5	5	#NULL!	4	#NULL!	5	#NULL!	4	5	#NULL!	4	#NULL!
850	0	#NULL!	#NULL!	0	1	1	2	1	0	#NULL!	#NULL!	0	0	#NULL!	#NULL!	0	1	2	3	3	0	#NULL!	#NULL!	0	0	#NULL!	#NULL!	0	0	#NULL!	#NULL!	0	1	#NULL!	#NULL!	#NULL!	#NULL!	#NULL!	#NULL!	#NULL!	#NULL!	#NULL!	#NULL!	#NULL!	2	#NULL!	#NULL!	#NULL!	#NULL!
852	0	#NULL!	#NULL!	0	1	3	30	3	0	#NULL!	#NULL!	0	0	#NULL!	#NULL!	0	1	2	3	2	1	5	20	2	1	1	1	1	0	#NULL!	#NULL!	0	4	5	5	2	4	5	5	5	3	#NULL!	2	2	5	3	#NULL!	2	#NULL!
853	0	#NULL!	#NULL!	0	1	3	5	2	0	#NULL!	#NULL!	0	0	#NULL!	#NULL!	0	0	#NULL!	#NULL!	0	0	#NULL!	#NULL!	0	1	1	1	3	0	#NULL!	#NULL!	0	1	#NULL!	2	#NULL!	#NULL!	#NULL!	#NULL!	5	#NULL!	#NULL!	#NULL!	#NULL!	2	#NULL!	4	#NULL!	#NULL!
854	0	#NULL!	#NULL!	0	0	#NULL!	#NULL!	0	0	#NULL!	#NULL!	0	0	#NULL!	#NULL!	0	1	3	7	4	1	1	1	3	1	4	8	4	0	#NULL!	#NULL!	0	3	3	#NULL!	#NULL!	1	4	#NULL!	2	5	2	#NULL!	#NULL!	#NULL!	#NULL!	#NULL!	1	#NULL!
856	1	3	18	2	1	4	50	3	0	#NULL!	#NULL!	0	0	#NULL!	#NULL!	0	1	3	2	2	0	#NULL!	#NULL!	0	1	3	2	2	0	#NULL!	#NULL!	0	4	1	4	1	#NULL!	4	#NULL!	#NULL!	5	1	#NULL!	4	5	5	#NULL!	#NULL!	#NULL!
859	0	#NULL!	#NULL!	0	1	2	3	1	0	#NULL!	#NULL!	0	0	#NULL!	#NULL!	0	0	#NULL!	#NULL!	0	1	1	1	2	0	#NULL!	#NULL!	0	0	#NULL!	#NULL!	0	1	4	#NULL!	#NULL!	#NULL!	3	5	#NULL!	5	#NULL!	5	#NULL!	3	5	#NULL!	#NULL!	#NULL!
865	0	#NULL!	#NULL!	0	1	3	10	4	1	1	2	1	0	#NULL!	#NULL!	0	1	3	15	4	1	2	4	3	0	#NULL!	#NULL!	0	0	#NULL!	#NULL!	0	5	3	4	#NULL!	#NULL!	3	5	#NULL!	1	1	5	1	5	4	#NULL!	4	#NULL!
867	0	#NULL!	#NULL!	0	1	1	1	1	0	#NULL!	#NULL!	0	0	#NULL!	#NULL!	0	1	1	1	1	1	1	1	1	0	#NULL!	#NULL!	0	0	#NULL!	#NULL!	0	1	#NULL!	#NULL!	#NULL!	#NULL!	#NULL!	#NULL!	#NULL!	#NULL!	#NULL!	#NULL!	#NULL!	#NULL!	#NULL!	#NULL!	#NULL!	#NULL!
868	0	#NULL!	#NULL!	0	0	#NULL!	#NULL!	0	0	#NULL!	#NULL!	0	0	#NULL!	#NULL!	0	1	2	2	1	1	2	4	2	1	2	2	2	0	#NULL!	#NULL!	0	1	#NULL!	#NULL!	#NULL!	#NULL!	#NULL!	#NULL!	#NULL!	#NULL!	#NULL!	#NULL!	#NULL!	#NULL!	#NULL!	#NULL!	#NULL!	#NULL!
870	0	#NULL!	#NULL!	0	1	1	4	1	0	#NULL!	#NULL!	0	0	#NULL!	#NULL!	0	0	#NULL!	#NULL!	0	0	#NULL!	#NULL!	0	0	#NULL!	#NULL!	0	0	#NULL!	#NULL!	0	1	#NULL!	#NULL!	#NULL!	#NULL!	#NULL!	#NULL!	#NULL!	#NULL!	#NULL!	#NULL!	#NULL!	#NULL!	#NULL!	#NULL!	#NULL!	#NULL!
871	0	#NULL!	#NULL!	0	1	3	3	5	0	#NULL!	#NULL!	0	0	#NULL!	#NULL!	0	1	2	2	2	1	3	4	3	1	2	3	3	0	#NULL!	#NULL!	0	2	#NULL!	1	#NULL!	#NULL!	1	#NULL!	#NULL!	1	#NULL!	1	#NULL!	1	#NULL!	#NULL!	#NULL!	#NULL!
872	0	#NULL!	#NULL!	0	1	1	1	2	0	#NULL!	#NULL!	0	1	4	40	3	1	3	6	4	0	#NULL!	#NULL!	0	0	#NULL!	#NULL!	0	0	#NULL!	#NULL!	0	4	5	5	4	3	4	5	3	5	2	4	1	4	3	#NULL!	4	#NULL!
877	0	#NULL!	#NULL!	0	0	#NULL!	#NULL!	0	0	#NULL!	#NULL!	0	0	#NULL!	#NULL!	0	1	2	8	3	1	2	7	2	1	2	6	3	1	2	5	5	4	#NULL!	5	#NULL!	#NULL!	#NULL!	#NULL!	#NULL!	3	#NULL!	#NULL!	4	#NULL!	5	#NULL!	3	#NULL!
878	0	#NULL!	#NULL!	0	1	5	600	5	0	#NULL!	#NULL!	0	0	#NULL!	#NULL!	0	1	2	4	2	1	1	1	1	1	2	3	2	1	1	1	1	3	5	5	3	#NULL!	4	5	#NULL!	#NULL!	#NULL!	5	4	5	5	#NULL!	3	#NULL!
879	1	1	2	1	1	2	3	1	0	#NULL!	#NULL!	0	0	#NULL!	#NULL!	0	1	2	3	1	0	#NULL!	#NULL!	0	0	#NULL!	#NULL!	0	0	#NULL!	#NULL!	0	5	5	5	#NULL!	3	1	#NULL!	#NULL!	2	#NULL!	5	5	5	5	#NULL!	5	#NULL!
880	0	#NULL!	#NULL!	0	1	1	3	2	0	#NULL!	#NULL!	0	0	#NULL!	#NULL!	0	1	1	3	3	1	2	5	3	0	#NULL!	#NULL!	0	0	#NULL!	#NULL!	0	1	#NULL!	1	#NULL!	#NULL!	#NULL!	#NULL!	#NULL!	2	#NULL!	#NULL!	#NULL!	#NULL!	2	#NULL!	#NULL!	#NULL!
881	1	4	20	3	1	4	50	4	0	#NULL!	#NULL!	0	0	#NULL!	#NULL!	0	1	3	3	3	0	#NULL!	#NULL!	0	1	2	2	2	0	#NULL!	#NULL!	0	1	4	#NULL!	4	#NULL!	#NULL!	#NULL!	#NULL!	#NULL!	#NULL!	#NULL!	#NULL!	#NULL!	#NULL!	#NULL!	3	#NULL!
883	0	#NULL!	#NULL!	0	0	#NULL!	#NULL!	0	0	#NULL!	#NULL!	0	0	#NULL!	#NULL!	0	1	2	2	1	0	#NULL!	#NULL!	0	0	#NULL!	#NULL!	0	0	#NULL!	#NULL!	0	3	3	4	2	#NULL!	5	#NULL!	#NULL!	4	3	1	3	4	5	#NULL!	3	#NULL!
885	0	#NULL!	#NULL!	0	1	1	3	1	0	#NULL!	#NULL!	0	1	1	1	1	1	1	2	1	0	#NULL!	#NULL!	0	1	1	1	3	0	#NULL!	#NULL!	0	1	#NULL!	#NULL!	#NULL!	#NULL!	1	#NULL!	#NULL!	#NULL!	#NULL!	#NULL!	#NULL!	4	#NULL!	#NULL!	1	#NULL!
888	0	#NULL!	#NULL!	0	1	1	4	1	0	#NULL!	#NULL!	0	0	#NULL!	#NULL!	0	1	1	2	1	0	#NULL!	#NULL!	0	0	#NULL!	#NULL!	0	1	1	3	1	3	#NULL!	2	2	#NULL!	2	#NULL!	#NULL!	#NULL!	#NULL!	#NULL!	#NULL!	4	4	#NULL!	1	#NULL!
890	0	#NULL!	#NULL!	0	0	#NULL!	#NULL!	0	0	#NULL!	#NULL!	0	0	#NULL!	#NULL!	0	1	1	2	2	1	4	7	4	1	1	1	3	0	#NULL!	#NULL!	0	1	2	1	#NULL!	#NULL!	5	#NULL!	#NULL!	1	1	4	4	5	3	#NULL!	3	#NULL!
896	0	#NULL!	#NULL!	0	1	5	50	4	0	#NULL!	#NULL!	0	0	#NULL!	#NULL!	0	1	3	10	4	1	1	3	3	1	1	2	4	1	2	2	5	3	2	4	#NULL!	#NULL!	4	#NULL!	#NULL!	#NULL!	#NULL!	5	5	5	4	5	#NULL!	#NULL!
897	0	#NULL!	#NULL!	0	1	4	100	2	0	#NULL!	#NULL!	0	0	#NULL!	#NULL!	0	1	1	2	1	0	#NULL!	#NULL!	0	1	1	1	2	0	#NULL!	#NULL!	0	4	5	#NULL!	4	3	3	5	5	5	#NULL!	5	#NULL!	5	5	#NULL!	4	1
898	0	#NULL!	#NULL!	0	0	#NULL!	#NULL!	0	0	#NULL!	#NULL!	0	0	#NULL!	#NULL!	0	1	1	10	3	1	1	10	3	1	1	1	4	0	#NULL!	#NULL!	0	4	#NULL!	4	5	5	5	#NULL!	#NULL!	3	#NULL!	#NULL!	#NULL!	4	5	#NULL!	5	#NULL!
899	0	#NULL!	#NULL!	0	0	#NULL!	#NULL!	0	0	#NULL!	#NULL!	0	0	#NULL!	#NULL!	0	1	2	3	3	1	4	6	4	0	#NULL!	#NULL!	0	0	#NULL!	#NULL!	0	5	#NULL!	5	#NULL!	#NULL!	5	5	#NULL!	4	#NULL!	5	#NULL!	5	5	#NULL!	3	#NULL!
900	0	#NULL!	#NULL!	0	0	#NULL!	#NULL!	0	0	#NULL!	#NULL!	0	0	#NULL!	#NULL!	0	1	1	2	1	1	1	1	1	0	#NULL!	#NULL!	0	0	#NULL!	#NULL!	0	1	#NULL!	5	#NULL!	#NULL!	#NULL!	#NULL!	#NULL!	#NULL!	#NULL!	#NULL!	#NULL!	#NULL!	#NULL!	#NULL!	#NULL!	#NULL!
901	0	#NULL!	#NULL!	0	0	#NULL!	#NULL!	0	0	#NULL!	#NULL!	0	0	#NULL!	#NULL!	0	1	3	15	3	1	3	5	2	1	4	15	3	1	2	5	4	4	5	5	5	5	4	5	4	4	4	5	4	5	5	#NULL!	3	5
903	1	4	2000	4	1	2	2	2	0	#NULL!	#NULL!	0	0	#NULL!	#NULL!	0	0	#NULL!	#NULL!	0	0	#NULL!	#NULL!	0	0	#NULL!	#NULL!	0	0	#NULL!	#NULL!	0	2	#NULL!	#NULL!	#NULL!	#NULL!	#NULL!	#NULL!	#NULL!	1	#NULL!	#NULL!	#NULL!	#NULL!	1	#NULL!	#NULL!	#NULL!
904	0	#NULL!	#NULL!	0	0	#NULL!	#NULL!	0	0	#NULL!	#NULL!	0	0	#NULL!	#NULL!	0	1	2	3	2	1	1	1	3	1	1	1	1	0	#NULL!	#NULL!	0	1	2	2	#NULL!	1	#NULL!	#NULL!	#NULL!	2	#NULL!	#NULL!	#NULL!	2	4	#NULL!	4	#NULL!
906	0	#NULL!	#NULL!	0	1	5	#NULL!	4	0	#NULL!	#NULL!	0	0	#NULL!	#NULL!	0	1	3	5	4	1	3	3	4	1	3	5	4	0	#NULL!	#NULL!	0	3	#NULL!	#NULL!	#NULL!	#NULL!	5	5	#NULL!	#NULL!	#NULL!	3	#NULL!	5	#NULL!	#NULL!	2	#NULL!
908	0	#NULL!	#NULL!	0	1	1	3	1	0	#NULL!	#NULL!	0	0	#NULL!	#NULL!	0	0	#NULL!	#NULL!	0	1	1	2	1	0	#NULL!	#NULL!	0	0	#NULL!	#NULL!	0	1	#NULL!	#NULL!	#NULL!	#NULL!	1	#NULL!	#NULL!	#NULL!	#NULL!	#NULL!	#NULL!	#NULL!	1	#NULL!	#NULL!	#NULL!
910	1	4	10	4	0	#NULL!	#NULL!	0	0	#NULL!	#NULL!	0	0	#NULL!	#NULL!	0	1	2	2	2	0	#NULL!	#NULL!	0	0	#NULL!	#NULL!	0	0	#NULL!	#NULL!	0	5	4	#NULL!	3	#NULL!	#NULL!	5	5	#NULL!	#NULL!	4	#NULL!	#NULL!	#NULL!	#NULL!	#NULL!	#NULL!
914	0	#NULL!	#NULL!	0	0	#NULL!	#NULL!	0	1	1	2	1	0	#NULL!	#NULL!	0	1	1	3	1	1	1	2	1	0	#NULL!	#NULL!	0	0	#NULL!	#NULL!	0	2	#NULL!	#NULL!	#NULL!	#NULL!	5	#NULL!	#NULL!	3	#NULL!	3	#NULL!	#NULL!	3	4	#NULL!	#NULL!
915	0	#NULL!	#NULL!	0	0	#NULL!	#NULL!	0	0	#NULL!	#NULL!	0	0	#NULL!	#NULL!	0	1	2	2	2	0	#NULL!	#NULL!	0	1	2	3	2	0	#NULL!	#NULL!	0	3	5	#NULL!	4	#NULL!	5	4	#NULL!	5	5	5	3	#NULL!	5	3	5	3
916	0	#NULL!	#NULL!	0	1	4	10	4	0	#NULL!	#NULL!	0	0	#NULL!	#NULL!	0	1	2	2	2	1	2	4	2	1	2	3	4	1	2	3	3	2	4	2	2	#NULL!	#NULL!	#NULL!	#NULL!	1	1	#NULL!	1	1	1	#NULL!	#NULL!	#NULL!
917	1	2	10	2	0	#NULL!	#NULL!	0	0	#NULL!	#NULL!	0	0	#NULL!	#NULL!	0	1	3	25	3	1	1	2	2	1	2	4	3	1	3	12	4	4	5	4	4	#NULL!	4	#NULL!	#NULL!	4	5	5	4	2	4	4	4	#NULL!
918	1	1	5	1	0	#NULL!	#NULL!	0	0	#NULL!	#NULL!	0	0	#NULL!	#NULL!	0	1	2	2	2	0	#NULL!	#NULL!	0	1	1	1	3	0	#NULL!	#NULL!	0	4	1	#NULL!	1	#NULL!	3	4	#NULL!	#NULL!	#NULL!	3	#NULL!	4	#NULL!	#NULL!	#NULL!	#NULL!
919	0	#NULL!	#NULL!	0	1	5	50	5	0	#NULL!	#NULL!	0	0	#NULL!	#NULL!	0	0	#NULL!	#NULL!	0	0	#NULL!	#NULL!	0	0	#NULL!	#NULL!	0	0	#NULL!	#NULL!	0	2	#NULL!	5	#NULL!	#NULL!	#NULL!	#NULL!	#NULL!	#NULL!	#NULL!	#NULL!	#NULL!	4	5	#NULL!	#NULL!	#NULL!
921	0	#NULL!	#NULL!	0	1	3	#NULL!	1	0	#NULL!	#NULL!	0	1	5	1000	5	1	1	1	2	0	#NULL!	#NULL!	0	1	2	100	4	0	#NULL!	#NULL!	0	3	4	5	#NULL!	3	2	#NULL!	#NULL!	#NULL!	3	2	4	1	3	#NULL!	5	#NULL!
922	0	#NULL!	#NULL!	0	1	4	10	3	0	#NULL!	#NULL!	0	0	#NULL!	#NULL!	0	0	#NULL!	#NULL!	0	0	#NULL!	#NULL!	0	0	#NULL!	#NULL!	0	0	#NULL!	#NULL!	0	1	#NULL!	3	#NULL!	#NULL!	#NULL!	#NULL!	#NULL!	#NULL!	#NULL!	#NULL!	#NULL!	#NULL!	#NULL!	#NULL!	#NULL!	#NULL!
924	0	#NULL!	#NULL!	0	1	1	1	1	0	#NULL!	#NULL!	0	0	#NULL!	#NULL!	0	0	#NULL!	#NULL!	0	0	#NULL!	#NULL!	0	0	#NULL!	#NULL!	0	0	#NULL!	#NULL!	0	1	#NULL!	#NULL!	#NULL!	#NULL!	#NULL!	#NULL!	#NULL!	#NULL!	#NULL!	#NULL!	#NULL!	#NULL!	#NULL!	#NULL!	#NULL!	#NULL!
926	0	#NULL!	#NULL!	0	1	3	10	3	0	#NULL!	#NULL!	0	0	#NULL!	#NULL!	0	0	#NULL!	#NULL!	0	0	#NULL!	#NULL!	0	0	#NULL!	#NULL!	0	0	#NULL!	#NULL!	0	1	#NULL!	#NULL!	#NULL!	#NULL!	#NULL!	2	#NULL!	#NULL!	#NULL!	#NULL!	#NULL!	5	3	#NULL!	#NULL!	#NULL!
928	0	#NULL!	#NULL!	0	0	#NULL!	#NULL!	0	0	#NULL!	#NULL!	0	0	#NULL!	#NULL!	0	1	3	2	2	1	3	4	3	0	#NULL!	#NULL!	0	0	#NULL!	#NULL!	0	1	4	4	#NULL!	#NULL!	#NULL!	#NULL!	#NULL!	5	4	5	5	#NULL!	4	#NULL!	#NULL!	4
930	0	#NULL!	#NULL!	0	0	#NULL!	#NULL!	0	0	#NULL!	#NULL!	0	0	#NULL!	#NULL!	0	1	5	50	3	1	1	2	4	1	3	12	5	1	2	5	5	5	3	3	#NULL!	#NULL!	5	#NULL!	#NULL!	5	2	3	1	4	4	#NULL!	3	#NULL!
936	0	#NULL!	#NULL!	0	1	5	1000	5	0	#NULL!	#NULL!	0	0	#NULL!	#NULL!	0	1	3	5	2	0	#NULL!	#NULL!	0	0	#NULL!	#NULL!	0	0	#NULL!	#NULL!	0	3	5	5	1	4	1	4	1	4	1	3	1	1	4	1	1	1
941	1	1	1	1	1	1	2	1	0	#NULL!	#NULL!	0	0	#NULL!	#NULL!	0	1	1	1	3	0	#NULL!	#NULL!	0	0	#NULL!	#NULL!	0	1	2	5	2	3	#NULL!	4	#NULL!	#NULL!	3	#NULL!	#NULL!	4	#NULL!	2	#NULL!	4	#NULL!	#NULL!	#NULL!	#NULL!
942	0	#NULL!	#NULL!	0	1	4	100	4	0	#NULL!	#NULL!	0	1	4	50	4	0	#NULL!	#NULL!	0	1	1	2	2	0	#NULL!	#NULL!	0	0	#NULL!	#NULL!	0	3	3	5	3	#NULL!	2	5	#NULL!	4	#NULL!	5	#NULL!	2	1	#NULL!	#NULL!	#NULL!
943	0	#NULL!	#NULL!	0	1	1	1	2	0	#NULL!	#NULL!	0	0	#NULL!	#NULL!	0	1	3	3	3	1	2	2	2	1	3	3	2	0	#NULL!	#NULL!	0	1	4	2	2	1	5	#NULL!	#NULL!	5	3	3	#NULL!	5	5	#NULL!	5	3
944	0	#NULL!	#NULL!	0	1	5	100	5	0	#NULL!	#NULL!	0	0	#NULL!	#NULL!	0	0	#NULL!	#NULL!	0	0	#NULL!	#NULL!	0	0	#NULL!	#NULL!	0	0	#NULL!	#NULL!	0	1	#NULL!	#NULL!	#NULL!	#NULL!	5	#NULL!	#NULL!	#NULL!	#NULL!	#NULL!	#NULL!	#NULL!	#NULL!	#NULL!	#NULL!	#NULL!
948	0	#NULL!	#NULL!	0	0	#NULL!	#NULL!	0	0	#NULL!	#NULL!	0	0	#NULL!	#NULL!	0	1	3	20	5	1	2	4	5	1	1	1	5	1	1	1	5	3	5	5	5	#NULL!	5	#NULL!	#NULL!	3	5	#NULL!	5	5	5	#NULL!	5	#NULL!
949	0	#NULL!	#NULL!	0	1	5	365	5	0	#NULL!	#NULL!	0	0	#NULL!	#NULL!	0	1	2	2	4	0	#NULL!	#NULL!	0	0	#NULL!	#NULL!	0	0	#NULL!	#NULL!	0	3	#NULL!	#NULL!	#NULL!	#NULL!	#NULL!	#NULL!	#NULL!	#NULL!	#NULL!	5	4	5	4	#NULL!	#NULL!	#NULL!
952	0	#NULL!	#NULL!	0	1	2	10	2	0	#NULL!	#NULL!	0	0	#NULL!	#NULL!	0	0	#NULL!	#NULL!	0	0	#NULL!	#NULL!	0	0	#NULL!	#NULL!	0	0	#NULL!	#NULL!	0	3	#NULL!	#NULL!	#NULL!	#NULL!	#NULL!	#NULL!	#NULL!	2	#NULL!	3	#NULL!	4	#NULL!	#NULL!	#NULL!	#NULL!
954	0	#NULL!	#NULL!	0	1	1	2	1	0	#NULL!	#NULL!	0	0	#NULL!	#NULL!	0	1	2	1	2	0	#NULL!	#NULL!	0	0	#NULL!	#NULL!	0	0	#NULL!	#NULL!	0	3	#NULL!	5	5	5	5	5	5	1	1	1	5	5	1	5	5	1
957	0	#NULL!	#NULL!	0	1	2	5	1	0	#NULL!	#NULL!	0	0	#NULL!	#NULL!	0	1	3	6	4	1	4	15	3	1	3	7	3	0	#NULL!	#NULL!	0	4	5	5	4	#NULL!	5	#NULL!	#NULL!	5	5	5	5	#NULL!	5	#NULL!	5	#NULL!
958	1	4	10	4	0	#NULL!	#NULL!	0	0	#NULL!	#NULL!	0	0	#NULL!	#NULL!	0	1	3	10	4	0	#NULL!	#NULL!	0	1	2	2	2	0	#NULL!	#NULL!	0	2	5	5	5	#NULL!	#NULL!	#NULL!	#NULL!	#NULL!	#NULL!	5	#NULL!	5	#NULL!	5	5	5
959	0	#NULL!	#NULL!	0	1	3	10	3	0	#NULL!	#NULL!	0	0	#NULL!	#NULL!	0	1	1	2	1	1	1	1	3	1	1	1	4	0	#NULL!	#NULL!	0	2	#NULL!	#NULL!	#NULL!	#NULL!	#NULL!	#NULL!	#NULL!	5	3	#NULL!	#NULL!	#NULL!	2	#NULL!	5	2
960	0	#NULL!	#NULL!	0	1	1	2	1	0	#NULL!	#NULL!	0	0	#NULL!	#NULL!	0	1	3	100	2	0	#NULL!	#NULL!	0	1	1	5	1	1	4	500	2	5	4	4	#NULL!	1	4	#NULL!	#NULL!	5	2	5	#NULL!	5	5	1	#NULL!	#NULL!
962	0	#NULL!	#NULL!	0	0	#NULL!	#NULL!	0	0	#NULL!	#NULL!	0	0	#NULL!	#NULL!	0	0	#NULL!	#NULL!	0	0	#NULL!	#NULL!	0	0	#NULL!	#NULL!	0	0	#NULL!	#NULL!	0	2	#NULL!	#NULL!	#NULL!	#NULL!	#NULL!	#NULL!	#NULL!	#NULL!	#NULL!	#NULL!	#NULL!	5	#NULL!	#NULL!	#NULL!	#NULL!
963	0	#NULL!	#NULL!	0	0	#NULL!	#NULL!	0	0	#NULL!	#NULL!	0	0	#NULL!	#NULL!	0	1	2	2	2	1	3	4	3	0	#NULL!	#NULL!	0	0	#NULL!	#NULL!	0	3	4	4	1	#NULL!	#NULL!	#NULL!	#NULL!	2	#NULL!	4	3	#NULL!	4	5	#NULL!	#NULL!
964	0	#NULL!	#NULL!	0	1	1	1	3	0	#NULL!	#NULL!	0	0	#NULL!	#NULL!	0	0	#NULL!	#NULL!	0	1	2	2	3	1	1	2	2	0	#NULL!	#NULL!	0	3	#NULL!	5	#NULL!	1	#NULL!	2	3	3	#NULL!	#NULL!	4	4	5	#NULL!	#NULL!	#NULL!
971	0	#NULL!	#NULL!	0	1	5	50	5	0	#NULL!	#NULL!	0	0	#NULL!	#NULL!	0	1	2	3	2	0	#NULL!	#NULL!	0	1	1	2	1	1	2	4	3	1	#NULL!	#NULL!	#NULL!	#NULL!	#NULL!	#NULL!	#NULL!	5	#NULL!	#NULL!	#NULL!	#NULL!	#NULL!	#NULL!	#NULL!	#NULL!
973	0	#NULL!	#NULL!	0	0	#NULL!	#NULL!	0	0	#NULL!	#NULL!	0	0	#NULL!	#NULL!	0	1	3	4.5	3	1	3	5	3	1	2	2	3	1	3	3	4	1	2	3	1	#NULL!	2	#NULL!	#NULL!	4	#NULL!	2	#NULL!	#NULL!	4	#NULL!	#NULL!	#NULL!
974	0	#NULL!	#NULL!	0	1	2	4	1	0	#NULL!	#NULL!	0	0	#NULL!	#NULL!	0	1	2	2	2	0	#NULL!	#NULL!	0	0	#NULL!	#NULL!	0	0	#NULL!	#NULL!	0	2	#NULL!	5	#NULL!	#NULL!	5	#NULL!	#NULL!	#NULL!	#NULL!	3	#NULL!	#NULL!	2	#NULL!	#NULL!	#NULL!
978	0	#NULL!	#NULL!	0	1	1	1	5	0	#NULL!	#NULL!	0	0	#NULL!	#NULL!	0	1	1	1	5	0	#NULL!	#NULL!	0	1	1	1	5	0	#NULL!	#NULL!	0	1	#NULL!	#NULL!	#NULL!	#NULL!	#NULL!	#NULL!	#NULL!	#NULL!	#NULL!	#NULL!	#NULL!	#NULL!	#NULL!	#NULL!	#NULL!	#NULL!
981	0	#NULL!	#NULL!	0	1	3	6	2	0	#NULL!	#NULL!	0	0	#NULL!	#NULL!	0	1	2	2	1	0	#NULL!	#NULL!	0	1	1	1	4	0	#NULL!	#NULL!	0	1	#NULL!	4	#NULL!	#NULL!	#NULL!	#NULL!	#NULL!	#NULL!	#NULL!	5	#NULL!	3	#NULL!	#NULL!	#NULL!	#NULL!
982	0	#NULL!	#NULL!	0	0	#NULL!	#NULL!	0	0	#NULL!	#NULL!	0	0	#NULL!	#NULL!	0	0	#NULL!	#NULL!	0	1	2	2	3	0	#NULL!	#NULL!	0	0	#NULL!	#NULL!	0	2	#NULL!	#NULL!	#NULL!	#NULL!	#NULL!	#NULL!	#NULL!	#NULL!	#NULL!	#NULL!	#NULL!	#NULL!	#NULL!	#NULL!	#NULL!	#NULL!
986	0	#NULL!	#NULL!	0	1	1	2	1	1	3	5	3	0	#NULL!	#NULL!	0	1	4	10	3	0	#NULL!	#NULL!	0	1	2	3	3	0	#NULL!	#NULL!	0	4	5	4	#NULL!	#NULL!	5	4	#NULL!	4	#NULL!	#NULL!	#NULL!	5	5	5	#NULL!	#NULL!
988	0	#NULL!	#NULL!	0	0	#NULL!	#NULL!	0	0	#NULL!	#NULL!	0	0	#NULL!	#NULL!	0	1	2	3	3	1	1	2	3	0	#NULL!	#NULL!	0	0	#NULL!	#NULL!	0	1	#NULL!	2	#NULL!	#NULL!	4	#NULL!	#NULL!	#NULL!	#NULL!	#NULL!	#NULL!	2	#NULL!	#NULL!	#NULL!	#NULL!
989	0	#NULL!	#NULL!	0	1	1	1	1	0	#NULL!	#NULL!	0	0	#NULL!	#NULL!	0	1	2	3	1	1	3	5	3	0	#NULL!	#NULL!	0	0	#NULL!	#NULL!	0	1	2	2	#NULL!	#NULL!	3	4	1	5	#NULL!	5	#NULL!	5	2	#NULL!	#NULL!	#NULL!
992	0	#NULL!	#NULL!	0	1	5	265	5	0	#NULL!	#NULL!	0	0	#NULL!	#NULL!	0	1	3	1	4	1	4	5	5	0	#NULL!	#NULL!	0	0	#NULL!	#NULL!	0	1	5	5	5	#NULL!	5	#NULL!	#NULL!	3	#NULL!	4	#NULL!	#NULL!	5	#NULL!	#NULL!	#NULL!
993	0	#NULL!	#NULL!	0	0	#NULL!	#NULL!	0	0	#NULL!	#NULL!	0	0	#NULL!	#NULL!	0	1	1	1	2	1	2	1	2	0	#NULL!	#NULL!	0	0	#NULL!	#NULL!	0	5	3	4	5	3	3	#NULL!	4	3	3	2	1	3	4	5	3	#NULL!
998	1	4	50	4	0	#NULL!	#NULL!	0	0	#NULL!	#NULL!	0	0	#NULL!	#NULL!	0	0	#NULL!	#NULL!	0	1	2	2	2	1	2	3	3	0	#NULL!	#NULL!	0	1	#NULL!	#NULL!	#NULL!	#NULL!	#NULL!	#NULL!	#NULL!	#NULL!	#NULL!	2	#NULL!	#NULL!	3	#NULL!	#NULL!	#NULL!
999	0	#NULL!	#NULL!	0	0	#NULL!	#NULL!	0	0	#NULL!	#NULL!	0	0	#NULL!	#NULL!	0	1	3	10	5	1	2	2	2	0	#NULL!	#NULL!	0	1	4	6	3	4	3	4	#NULL!	4	5	#NULL!	#NULL!	5	5	1	2	2	4	#NULL!	4	#NULL!
1000	0	#NULL!	#NULL!	0	0	#NULL!	#NULL!	0	0	#NULL!	#NULL!	0	0	#NULL!	#NULL!	0	0	#NULL!	#NULL!	0	1	1	1	1	0	#NULL!	#NULL!	0	0	#NULL!	#NULL!	0	3	1	3	3	#NULL!	#NULL!	2	3	3	#NULL!	3	#NULL!	3	3	#NULL!	#NULL!	#NULL!
1002	0	#NULL!	#NULL!	0	1	1	1	2	0	#NULL!	#NULL!	0	0	#NULL!	#NULL!	0	1	2	5	4	0	#NULL!	#NULL!	0	1	1	1	4	1	2	3	4	2	3	5	#NULL!	#NULL!	5	#NULL!	#NULL!	#NULL!	#NULL!	4	1	5	4	#NULL!	5	#NULL!
1005	0	#NULL!	#NULL!	0	1	3	12	2	0	#NULL!	#NULL!	0	0	#NULL!	#NULL!	0	1	4	10	4	1	4	9	3	0	#NULL!	#NULL!	0	0	#NULL!	#NULL!	0	5	5	3	#NULL!	#NULL!	5	#NULL!	#NULL!	3	#NULL!	5	5	5	3	#NULL!	#NULL!	#NULL!
1009	0	#NULL!	#NULL!	0	1	1	2	1	0	#NULL!	#NULL!	0	0	#NULL!	#NULL!	0	1	1	3	3	0	#NULL!	#NULL!	0	1	1	2	5	0	#NULL!	#NULL!	0	1	#NULL!	5	#NULL!	#NULL!	4	#NULL!	#NULL!	#NULL!	#NULL!	4	#NULL!	5	5	#NULL!	#NULL!	#NULL!
1010	1	2	20	1	1	3	10	3	0	#NULL!	#NULL!	0	0	#NULL!	#NULL!	0	1	2	4	5	0	#NULL!	#NULL!	0	1	2	4	5	1	1	4	5	1	3	3	#NULL!	#NULL!	5	#NULL!	#NULL!	3	#NULL!	#NULL!	#NULL!	4	#NULL!	#NULL!	#NULL!	#NULL!
1013	0	#NULL!	#NULL!	0	0	#NULL!	#NULL!	0	0	#NULL!	#NULL!	0	0	#NULL!	#NULL!	0	1	3	3	1	1	4	2	1	1	2	1	1	0	#NULL!	#NULL!	0	5	4	3	1	#NULL!	5	3	#NULL!	#NULL!	#NULL!	5	4	5	3	#NULL!	#NULL!	#NULL!
1017	0	#NULL!	#NULL!	0	1	5	100	4	1	1	1	3	0	#NULL!	#NULL!	0	1	2	5	3	1	3	10	4	1	3	10	3	0	#NULL!	#NULL!	0	3	5	4	2	3	5	1	2	4	3	5	4	4	4	2	5	2
1022	1	2	10	2	1	5	50	4	0	#NULL!	#NULL!	0	0	#NULL!	#NULL!	0	1	3	3	4	0	#NULL!	#NULL!	0	0	#NULL!	#NULL!	0	0	#NULL!	#NULL!	0	3	3	5	#NULL!	#NULL!	5	5	#NULL!	5	#NULL!	4	#NULL!	5	5	#NULL!	#NULL!	#NULL!
1023	0	#NULL!	#NULL!	0	1	3	12	3	1	1	1	5	0	#NULL!	#NULL!	0	1	1	1	1	1	2	3	3	1	1	1	3	0	#NULL!	#NULL!	0	2	4	4	1	#NULL!	1	#NULL!	#NULL!	#NULL!	#NULL!	#NULL!	1	3	#NULL!	#NULL!	#NULL!	#NULL!
1025	0	#NULL!	#NULL!	0	0	#NULL!	#NULL!	0	0	#NULL!	#NULL!	0	0	#NULL!	#NULL!	0	1	2	2	1	0	#NULL!	#NULL!	0	0	#NULL!	#NULL!	0	0	#NULL!	#NULL!	0	2	#NULL!	3	#NULL!	#NULL!	3	#NULL!	#NULL!	#NULL!	#NULL!	#NULL!	#NULL!	5	3	#NULL!	#NULL!	#NULL!
1026	0	#NULL!	#NULL!	0	0	#NULL!	#NULL!	0	0	#NULL!	#NULL!	0	1	1	10	2	1	4	30	4	0	#NULL!	#NULL!	0	1	2	5	2	0	#NULL!	#NULL!	0	2	4	2	3	#NULL!	4	3	#NULL!	4	#NULL!	4	#NULL!	#NULL!	5	#NULL!	#NULL!	#NULL!
1027	0	#NULL!	#NULL!	0	1	5	200	3	0	#NULL!	#NULL!	0	0	#NULL!	#NULL!	0	1	3	10	3	0	#NULL!	#NULL!	0	1	3	10	4	1	3	4	4	5	5	5	4	3	1	2	2	5	2	5	5	3	5	2	2	3
1028	1	5	200	5	1	5	15	3	0	#NULL!	#NULL!	0	0	#NULL!	#NULL!	0	1	2	5	3	1	4	15	3	0	#NULL!	#NULL!	0	1	2	2	2	4	5	5	#NULL!	3	5	5	#NULL!	5	5	4	#NULL!	5	5	#NULL!	#NULL!	#NULL!
1033	1	1	3	1	0	#NULL!	#NULL!	0	1	1	1	3	0	#NULL!	#NULL!	0	1	3	15	2	0	#NULL!	#NULL!	0	0	#NULL!	#NULL!	0	0	#NULL!	#NULL!	0	3	#NULL!	#NULL!	#NULL!	#NULL!	#NULL!	1	2	#NULL!	#NULL!	#NULL!	#NULL!	2	4	#NULL!	#NULL!	#NULL!
1034	0	#NULL!	#NULL!	0	0	#NULL!	#NULL!	0	0	#NULL!	#NULL!	0	0	#NULL!	#NULL!	0	1	2	3	4	0	#NULL!	#NULL!	0	1	1	2	4	1	1	1	1	1	#NULL!	#NULL!	#NULL!	#NULL!	#NULL!	#NULL!	#NULL!	#NULL!	#NULL!	#NULL!	#NULL!	4	#NULL!	#NULL!	#NULL!	#NULL!
1036	0	#NULL!	#NULL!	0	0	#NULL!	#NULL!	0	0	#NULL!	#NULL!	0	0	#NULL!	#NULL!	0	1	2	3	1	1	2	2	2	1	1	2	1	0	#NULL!	#NULL!	0	3	3	3	#NULL!	#NULL!	4	2	#NULL!	5	#NULL!	4	3	3	4	#NULL!	#NULL!	#NULL!
1038	1	5	1000	4	0	#NULL!	#NULL!	0	1	1	2	3	0	#NULL!	#NULL!	0	1	4	5	3	1	4	20	2	1	2	3	4	0	#NULL!	#NULL!	0	1	5	#NULL!	#NULL!	5	3	#NULL!	#NULL!	#NULL!	#NULL!	4	#NULL!	5	#NULL!	#NULL!	#NULL!	#NULL!
1040	0	#NULL!	#NULL!	0	0	#NULL!	#NULL!	0	0	#NULL!	#NULL!	0	0	#NULL!	#NULL!	0	1	2	5	4	1	2	2	4	1	1	1	5	0	#NULL!	#NULL!	0	2	#NULL!	3	#NULL!	3	#NULL!	#NULL!	#NULL!	2	#NULL!	2	#NULL!	#NULL!	5	#NULL!	5	#NULL!
1041	1	2	4	3	1	1	2	1	0	#NULL!	#NULL!	0	0	#NULL!	#NULL!	0	1	1	1	2	1	1	1	2	1	2	3	3	0	#NULL!	#NULL!	0	2	1	4	2	4	#NULL!	#NULL!	#NULL!	#NULL!	#NULL!	#NULL!	#NULL!	1	#NULL!	#NULL!	#NULL!	#NULL!
1042	0	#NULL!	#NULL!	0	1	1	1	2	0	#NULL!	#NULL!	0	0	#NULL!	#NULL!	0	0	#NULL!	#NULL!	0	0	#NULL!	#NULL!	0	1	1	1	3	0	#NULL!	#NULL!	0	2	3	4	#NULL!	#NULL!	5	4	#NULL!	#NULL!	#NULL!	4	1	#NULL!	5	4	#NULL!	#NULL!
1044	0	#NULL!	#NULL!	0	1	2	4	1	0	#NULL!	#NULL!	0	0	#NULL!	#NULL!	0	1	3	15	4	1	1	3	1	1	3	10	4	0	#NULL!	#NULL!	0	3	3	3	3	#NULL!	5	4	#NULL!	3	2	4	3	5	5	#NULL!	3	#NULL!
1047	0	#NULL!	#NULL!	0	1	1	2	2	1	3	10	4	0	#NULL!	#NULL!	0	1	1	1	1	0	#NULL!	#NULL!	0	1	2	3	3	0	#NULL!	#NULL!	0	2	2	3	#NULL!	#NULL!	#NULL!	#NULL!	#NULL!	#NULL!	#NULL!	3	#NULL!	3	4	#NULL!	3	#NULL!
1052	0	#NULL!	#NULL!	0	0	#NULL!	#NULL!	0	0	#NULL!	#NULL!	0	0	#NULL!	#NULL!	0	1	5	60	1	0	#NULL!	#NULL!	0	1	5	55	5	0	#NULL!	#NULL!	0	5	#NULL!	4	#NULL!	#NULL!	4	#NULL!	#NULL!	#NULL!	#NULL!	2	#NULL!	3	5	#NULL!	#NULL!	#NULL!
1055	0	#NULL!	#NULL!	0	1	2	2	2	0	#NULL!	#NULL!	0	0	#NULL!	#NULL!	0	0	#NULL!	#NULL!	0	0	#NULL!	#NULL!	0	0	#NULL!	#NULL!	0	0	#NULL!	#NULL!	0	3	#NULL!	3	#NULL!	#NULL!	4	#NULL!	#NULL!	4	#NULL!	5	2	5	#NULL!	#NULL!	5	#NULL!
1057	1	1	1	1	1	1	2	1	0	#NULL!	#NULL!	0	0	#NULL!	#NULL!	0	1	1	3	3	1	1	1	1	1	1	3	5	1	4	15	3	1	3	#NULL!	#NULL!	#NULL!	#NULL!	#NULL!	#NULL!	5	#NULL!	3	#NULL!	5	2	#NULL!	#NULL!	#NULL!
1058	1	1	2	1	0	#NULL!	#NULL!	0	0	#NULL!	#NULL!	0	0	#NULL!	#NULL!	0	1	1	3	2	1	2	4	2	0	#NULL!	#NULL!	0	0	#NULL!	#NULL!	0	1	#NULL!	4	#NULL!	#NULL!	3	#NULL!	3	#NULL!	#NULL!	5	#NULL!	5	5	#NULL!	#NULL!	#NULL!
1059	0	#NULL!	#NULL!	0	1	1	2	1	0	#NULL!	#NULL!	0	0	#NULL!	#NULL!	0	1	3	5	3	1	1	1	2	1	2	3	2	0	#NULL!	#NULL!	0	1	#NULL!	#NULL!	#NULL!	#NULL!	#NULL!	#NULL!	#NULL!	#NULL!	#NULL!	#NULL!	#NULL!	#NULL!	#NULL!	#NULL!	#NULL!	#NULL!
1060	0	#NULL!	#NULL!	0	0	#NULL!	#NULL!	0	0	#NULL!	#NULL!	0	0	#NULL!	#NULL!	0	1	1	2	2	0	#NULL!	#NULL!	0	0	#NULL!	#NULL!	0	0	#NULL!	#NULL!	0	4	4	4	4	#NULL!	4	#NULL!	#NULL!	4	#NULL!	2	4	4	2	#NULL!	4	#NULL!
1062	0	#NULL!	#NULL!	0	1	3	25	3	0	#NULL!	#NULL!	0	0	#NULL!	#NULL!	0	1	1	2	3	0	#NULL!	#NULL!	0	1	1	2	3	0	#NULL!	#NULL!	0	1	2	#NULL!	#NULL!	#NULL!	5	#NULL!	#NULL!	2	#NULL!	1	#NULL!	5	2	#NULL!	5	#NULL!
1066	0	#NULL!	#NULL!	0	1	3	7	4	1	1	1	2	0	#NULL!	#NULL!	0	1	4	10	4	0	#NULL!	#NULL!	0	1	3	8	4	0	#NULL!	#NULL!	0	5	5	4	#NULL!	#NULL!	5	5	5	3	#NULL!	1	4	2	5	5	5	#NULL!
1068	1	2	3	4	1	3	5	4	1	2	1	2	0	#NULL!	#NULL!	0	1	1	1	1	0	#NULL!	#NULL!	0	0	#NULL!	#NULL!	0	0	#NULL!	#NULL!	0	5	5	5	5	#NULL!	5	5	5	5	5	5	5	5	5	5	#NULL!	#NULL!
1069	1	2	2	1	1	2	3	2	0	#NULL!	#NULL!	0	1	4	15	4	1	3	10	3	1	2	5	3	1	3	8	3	1	3	7	3	4	5	4	5	2	4	5	5	5	#NULL!	5	3	5	5	#NULL!	#NULL!	#NULL!
1070	1	1	4	1	1	2	20	2	0	#NULL!	#NULL!	0	0	#NULL!	#NULL!	0	1	1	1	1	1	1	3	2	1	2	5	1	0	#NULL!	#NULL!	0	1	#NULL!	3	#NULL!	#NULL!	#NULL!	#NULL!	#NULL!	#NULL!	#NULL!	#NULL!	#NULL!	#NULL!	#NULL!	#NULL!	#NULL!	#NULL!
1071	1	2	5	3	1	3	2	3	0	#NULL!	#NULL!	0	0	#NULL!	#NULL!	0	1	2	2	4	0	#NULL!	#NULL!	0	1	2	2	3	1	2	2	3	3	4	4	4	4	3	2	1	2	4	3	4	1	4	4	4	1
1073	0	#NULL!	#NULL!	0	0	#NULL!	#NULL!	0	1	1	2	3	0	#NULL!	#NULL!	0	0	#NULL!	#NULL!	0	0	#NULL!	#NULL!	0	0	#NULL!	#NULL!	0	0	#NULL!	#NULL!	0	3	4	4	4	#NULL!	4	4	#NULL!	4	#NULL!	4	4	4	4	#NULL!	4	#NULL!
1074	1	2	7	1	1	1	2	1	1	3	10	4	0	#NULL!	#NULL!	0	1	2	3	2	0	#NULL!	#NULL!	0	1	2	3	3	0	#NULL!	#NULL!	0	1	#NULL!	#NULL!	#NULL!	#NULL!	#NULL!	#NULL!	#NULL!	#NULL!	#NULL!	#NULL!	#NULL!	4	#NULL!	#NULL!	#NULL!	#NULL!
1081	0	#NULL!	#NULL!	0	1	1	4	1	0	#NULL!	#NULL!	0	0	#NULL!	#NULL!	0	1	1	2	1	0	#NULL!	#NULL!	0	0	#NULL!	#NULL!	0	0	#NULL!	#NULL!	0	3	2	4	#NULL!	#NULL!	5	1	#NULL!	1	#NULL!	5	#NULL!	4	5	#NULL!	#NULL!	#NULL!
1084	0	#NULL!	#NULL!	0	0	#NULL!	#NULL!	0	0	#NULL!	#NULL!	0	0	#NULL!	#NULL!	0	1	2	3	2	1	1	2	1	0	#NULL!	#NULL!	0	0	#NULL!	#NULL!	0	1	#NULL!	#NULL!	#NULL!	#NULL!	#NULL!	#NULL!	#NULL!	#NULL!	#NULL!	#NULL!	#NULL!	#NULL!	#NULL!	#NULL!	#NULL!	#NULL!
1089	0	#NULL!	#NULL!	0	0	#NULL!	#NULL!	0	1	2	5	3	1	4	20	4	1	3	3	2	0	#NULL!	#NULL!	0	0	#NULL!	#NULL!	0	0	#NULL!	#NULL!	0	4	4	4	5	#NULL!	#NULL!	4	#NULL!	5	#NULL!	2	1	5	5	5	#NULL!	#NULL!
1090	0	#NULL!	#NULL!	0	1	4	5	5	0	#NULL!	#NULL!	0	0	#NULL!	#NULL!	0	0	#NULL!	#NULL!	0	0	#NULL!	#NULL!	0	0	#NULL!	#NULL!	0	0	#NULL!	#NULL!	0	5	2	2	2	2	2	2	2	5	#NULL!	#NULL!	#NULL!	5	5	#NULL!	#NULL!	#NULL!
1091	0	#NULL!	#NULL!	0	1	5	150	4	0	#NULL!	#NULL!	0	0	#NULL!	#NULL!	0	1	4	10	3	1	4	15	4	1	4	8	4	1	4	6	4	4	#NULL!	3	#NULL!	5	3	#NULL!	#NULL!	5	4	#NULL!	#NULL!	4	4	#NULL!	#NULL!	4
1092	0	#NULL!	#NULL!	0	1	2	1	1	0	#NULL!	#NULL!	0	0	#NULL!	#NULL!	0	1	1	1	1	1	1	1	1	1	2	2	2	0	#NULL!	#NULL!	0	1	#NULL!	#NULL!	#NULL!	#NULL!	#NULL!	#NULL!	#NULL!	3	#NULL!	3	#NULL!	#NULL!	2	#NULL!	#NULL!	#NULL!
1095	0	#NULL!	#NULL!	0	1	3	100	1	0	#NULL!	#NULL!	0	0	#NULL!	#NULL!	0	1	2	10	1	0	#NULL!	#NULL!	0	1	1	3	2	0	#NULL!	#NULL!	0	3	3	#NULL!	#NULL!	#NULL!	3	5	#NULL!	#NULL!	#NULL!	2	#NULL!	3	4	#NULL!	#NULL!	#NULL!
1096	0	#NULL!	#NULL!	0	1	1	5	1	0	#NULL!	#NULL!	0	0	#NULL!	#NULL!	0	1	1	1	2	1	1	2	2	1	1	3	2	0	#NULL!	#NULL!	0	1	#NULL!	2	3	3	5	#NULL!	#NULL!	1	#NULL!	5	#NULL!	2	5	#NULL!	1	#NULL!
1101	0	#NULL!	#NULL!	0	1	5	150	5	0	#NULL!	#NULL!	0	0	#NULL!	#NULL!	0	1	1	20	1	0	#NULL!	#NULL!	0	0	#NULL!	#NULL!	0	0	#NULL!	#NULL!	0	1	#NULL!	#NULL!	#NULL!	#NULL!	2	#NULL!	#NULL!	#NULL!	#NULL!	#NULL!	#NULL!	#NULL!	#NULL!	#NULL!	2	#NULL!
1105	0	#NULL!	#NULL!	0	1	5	100	3	0	#NULL!	#NULL!	0	0	#NULL!	#NULL!	0	1	1	20	1	0	#NULL!	#NULL!	0	0	#NULL!	#NULL!	0	0	#NULL!	#NULL!	0	1	2	2	#NULL!	#NULL!	#NULL!	#NULL!	#NULL!	2	#NULL!	#NULL!	#NULL!	#NULL!	2	#NULL!	3	#NULL!
1106	0	#NULL!	#NULL!	0	0	#NULL!	#NULL!	0	0	#NULL!	#NULL!	0	0	#NULL!	#NULL!	0	1	1	2	2	0	#NULL!	#NULL!	0	1	1	2	2	0	#NULL!	#NULL!	0	1	#NULL!	#NULL!	#NULL!	#NULL!	#NULL!	#NULL!	#NULL!	3	#NULL!	#NULL!	#NULL!	#NULL!	#NULL!	#NULL!	#NULL!	#NULL!
1109	0	#NULL!	#NULL!	0	0	#NULL!	#NULL!	0	0	#NULL!	#NULL!	0	0	#NULL!	#NULL!	0	1	2	2	2	0	#NULL!	#NULL!	0	1	1	1	4	0	#NULL!	#NULL!	0	4	#NULL!	1	#NULL!	1	#NULL!	#NULL!	#NULL!	#NULL!	#NULL!	#NULL!	3	4	1	#NULL!	#NULL!	#NULL!
1111	0	#NULL!	#NULL!	0	0	#NULL!	#NULL!	0	1	2	3	2	0	#NULL!	#NULL!	0	0	#NULL!	#NULL!	0	1	4	3	2	1	2	2	2	0	#NULL!	#NULL!	0	2	#NULL!	#NULL!	4	#NULL!	1	#NULL!	#NULL!	#NULL!	#NULL!	#NULL!	3	#NULL!	#NULL!	#NULL!	#NULL!	#NULL!
1117	0	#NULL!	#NULL!	0	1	1	2	1	0	#NULL!	#NULL!	0	1	1	2	1	1	3	5	1	1	3	10	1	1	2	4	4	0	#NULL!	#NULL!	0	3	1	1	#NULL!	#NULL!	2	#NULL!	#NULL!	#NULL!	#NULL!	1	#NULL!	3	#NULL!	#NULL!	#NULL!	#NULL!
1122	0	#NULL!	#NULL!	0	1	2	2	2	0	#NULL!	#NULL!	0	0	#NULL!	#NULL!	0	1	3	15	3	1	3	10	3	1	2	3	4	0	#NULL!	#NULL!	0	4	5	4	3	#NULL!	5	5	3	5	4	4	3	#NULL!	5	2	5	#NULL!
1125	0	#NULL!	#NULL!	0	0	#NULL!	#NULL!	0	0	#NULL!	#NULL!	0	0	#NULL!	#NULL!	0	1	1	2	1	0	#NULL!	#NULL!	0	0	#NULL!	#NULL!	0	0	#NULL!	#NULL!	0	1	#NULL!	3	#NULL!	#NULL!	#NULL!	#NULL!	#NULL!	1	#NULL!	#NULL!	#NULL!	3	4	1	#NULL!	#NULL!
1126	1	2	3	3	0	#NULL!	#NULL!	0	1	3	8	4	0	#NULL!	#NULL!	0	1	1	1	3	0	#NULL!	#NULL!	0	1	2	3	3	0	#NULL!	#NULL!	0	1	#NULL!	3	#NULL!	1	#NULL!	1	#NULL!	#NULL!	#NULL!	4	#NULL!	2	#NULL!	#NULL!	#NULL!	#NULL!
1127	0	#NULL!	#NULL!	0	1	3	15	2	0	#NULL!	#NULL!	0	0	#NULL!	#NULL!	0	1	3	2	4	0	#NULL!	#NULL!	0	0	#NULL!	#NULL!	0	0	#NULL!	#NULL!	0	1	#NULL!	#NULL!	1	1	#NULL!	#NULL!	4	3	#NULL!	#NULL!	#NULL!	2	#NULL!	5	5	#NULL!
1136	1	3	20	4	1	2	3	2	0	#NULL!	#NULL!	0	0	#NULL!	#NULL!	0	1	2	1	1	0	#NULL!	#NULL!	0	0	#NULL!	#NULL!	0	1	2	2	1	5	#NULL!	5	#NULL!	#NULL!	3	#NULL!	#NULL!	#NULL!	#NULL!	#NULL!	#NULL!	#NULL!	#NULL!	#NULL!	#NULL!	#NULL!
1137	0	#NULL!	#NULL!	0	0	#NULL!	#NULL!	0	0	#NULL!	#NULL!	0	0	#NULL!	#NULL!	0	1	1	2	1	1	1	2	1	0	#NULL!	#NULL!	0	0	#NULL!	#NULL!	0	3	1	1	#NULL!	#NULL!	4	#NULL!	#NULL!	1	#NULL!	4	#NULL!	#NULL!	4	5	#NULL!	#NULL!
1139	1	1	3	1	1	5	50	5	0	#NULL!	#NULL!	0	0	#NULL!	#NULL!	0	1	3	3	4	0	#NULL!	#NULL!	0	1	3	5	5	0	#NULL!	#NULL!	0	4	#NULL!	2	#NULL!	#NULL!	5	4	#NULL!	4	#NULL!	5	5	5	5	#NULL!	#NULL!	#NULL!
1142	0	#NULL!	#NULL!	0	1	2	5	2	0	#NULL!	#NULL!	0	1	5	50	5	1	2	4	4	1	1	2	3	1	3	6	4	1	4	15	5	5	2	4	#NULL!	1	4	5	4	#NULL!	#NULL!	5	#NULL!	5	5	#NULL!	5	#NULL!
1143	0	#NULL!	#NULL!	0	0	#NULL!	#NULL!	0	0	#NULL!	#NULL!	0	0	#NULL!	#NULL!	0	1	4	5	3	0	#NULL!	#NULL!	0	0	#NULL!	#NULL!	0	0	#NULL!	#NULL!	0	1	#NULL!	5	3	5	#NULL!	3	#NULL!	#NULL!	#NULL!	4	5	#NULL!	#NULL!	5	#NULL!	#NULL!
1148	0	#NULL!	#NULL!	0	0	#NULL!	#NULL!	0	1	3	1	2	0	#NULL!	#NULL!	0	1	3	3	3	0	#NULL!	#NULL!	0	1	3	4	4	1	3	1	5	4	5	5	5	5	5	5	5	5	5	5	5	5	5	5	5	2
1150	0	#NULL!	#NULL!	0	0	#NULL!	#NULL!	0	0	#NULL!	#NULL!	0	0	#NULL!	#NULL!	0	1	1	3	2	1	2	3	2	1	1	2	3	0	#NULL!	#NULL!	0	2	4	#NULL!	#NULL!	#NULL!	5	1	#NULL!	5	2	4	#NULL!	1	5	#NULL!	#NULL!	#NULL!
1152	0	#NULL!	#NULL!	0	1	1	2	1	0	#NULL!	#NULL!	0	1	3	5	3	0	#NULL!	#NULL!	0	0	#NULL!	#NULL!	0	1	4	10	4	0	#NULL!	#NULL!	0	3	#NULL!	5	#NULL!	5	3	#NULL!	#NULL!	2	#NULL!	#NULL!	#NULL!	5	4	#NULL!	#NULL!	#NULL!
1153	0	#NULL!	#NULL!	0	0	#NULL!	#NULL!	0	0	#NULL!	#NULL!	0	0	#NULL!	#NULL!	0	1	2	5	2	1	1	2	2	0	#NULL!	#NULL!	0	0	#NULL!	#NULL!	0	3	2	5	1	2	4	5	#NULL!	#NULL!	#NULL!	4	2	5	5	#NULL!	#NULL!	#NULL!
1158	0	#NULL!	#NULL!	0	0	#NULL!	#NULL!	0	0	#NULL!	#NULL!	0	0	#NULL!	#NULL!	0	1	1	3	1	0	#NULL!	#NULL!	0	1	1	1	2	0	#NULL!	#NULL!	0	3	#NULL!	3	#NULL!	#NULL!	3	#NULL!	#NULL!	#NULL!	#NULL!	1	#NULL!	#NULL!	5	#NULL!	#NULL!	#NULL!
1159	0	#NULL!	#NULL!	0	0	#NULL!	#NULL!	0	0	#NULL!	#NULL!	0	0	#NULL!	#NULL!	0	1	2	3	3	0	#NULL!	#NULL!	0	1	1	1	4	0	#NULL!	#NULL!	0	2	#NULL!	3	#NULL!	#NULL!	#NULL!	2	#NULL!	#NULL!	#NULL!	#NULL!	#NULL!	4	3	#NULL!	#NULL!	#NULL!
1160	1	1	1	2	0	#NULL!	#NULL!	0	0	#NULL!	#NULL!	0	0	#NULL!	#NULL!	0	0	#NULL!	#NULL!	0	0	#NULL!	#NULL!	0	0	#NULL!	#NULL!	0	0	#NULL!	#NULL!	0	1	#NULL!	#NULL!	#NULL!	#NULL!	#NULL!	#NULL!	#NULL!	#NULL!	#NULL!	#NULL!	#NULL!	#NULL!	#NULL!	#NULL!	#NULL!	#NULL!
1161	0	#NULL!	#NULL!	0	1	5	50	5	0	#NULL!	#NULL!	0	0	#NULL!	#NULL!	0	0	#NULL!	#NULL!	0	0	#NULL!	#NULL!	0	0	#NULL!	#NULL!	0	0	#NULL!	#NULL!	0	1	#NULL!	2	#NULL!	#NULL!	2	1	#NULL!	#NULL!	#NULL!	1	4	3	#NULL!	5	#NULL!	#NULL!
1162	0	#NULL!	#NULL!	0	0	#NULL!	#NULL!	0	0	#NULL!	#NULL!	0	0	#NULL!	#NULL!	0	1	3	10	2	1	4	25	2	1	1	5	4	0	#NULL!	#NULL!	0	1	#NULL!	#NULL!	#NULL!	#NULL!	#NULL!	#NULL!	#NULL!	#NULL!	#NULL!	#NULL!	#NULL!	#NULL!	1	#NULL!	#NULL!	#NULL!
1165	1	1	1	1	1	4	30	2	1	1	1	1	0	#NULL!	#NULL!	0	1	1	5	2	0	#NULL!	#NULL!	0	1	1	3	2	0	#NULL!	#NULL!	0	2	#NULL!	3	#NULL!	#NULL!	4	#NULL!	#NULL!	#NULL!	2	3	2	#NULL!	#NULL!	2	#NULL!	#NULL!
1169	0	#NULL!	#NULL!	0	1	1	2	1	0	#NULL!	#NULL!	0	0	#NULL!	#NULL!	0	1	2	3	3	0	#NULL!	#NULL!	0	1	3	15	4	1	1	2	5	1	#NULL!	#NULL!	#NULL!	#NULL!	#NULL!	#NULL!	#NULL!	#NULL!	#NULL!	2	#NULL!	1	4	#NULL!	#NULL!	#NULL!
1173	0	#NULL!	#NULL!	0	0	#NULL!	#NULL!	0	0	#NULL!	#NULL!	0	0	#NULL!	#NULL!	0	0	#NULL!	#NULL!	0	0	#NULL!	#NULL!	0	0	#NULL!	#NULL!	0	0	#NULL!	#NULL!	0	3	#NULL!	4	#NULL!	#NULL!	3	#NULL!	#NULL!	3	#NULL!	#NULL!	#NULL!	#NULL!	5	#NULL!	#NULL!	#NULL!
1176	0	#NULL!	#NULL!	0	1	2	2	1	0	#NULL!	#NULL!	0	0	#NULL!	#NULL!	0	1	2	2	1	1	2	1	1	1	2	3	3	0	#NULL!	#NULL!	0	1	#NULL!	#NULL!	#NULL!	#NULL!	#NULL!	#NULL!	#NULL!	#NULL!	#NULL!	#NULL!	4	#NULL!	4	#NULL!	#NULL!	#NULL!
1177	0	#NULL!	#NULL!	0	1	1	20	1	0	#NULL!	#NULL!	0	0	#NULL!	#NULL!	0	0	#NULL!	#NULL!	0	0	#NULL!	#NULL!	0	1	1	3	1	0	#NULL!	#NULL!	0	5	3	4	3	2	3	4	5	#NULL!	2	3	5	5	3	#NULL!	4	#NULL!
1180	0	#NULL!	#NULL!	0	0	#NULL!	#NULL!	0	0	#NULL!	#NULL!	0	0	#NULL!	#NULL!	0	0	#NULL!	#NULL!	0	0	#NULL!	#NULL!	0	0	#NULL!	#NULL!	0	0	#NULL!	#NULL!	0	3	#NULL!	#NULL!	#NULL!	#NULL!	#NULL!	#NULL!	1	3	#NULL!	#NULL!	#NULL!	#NULL!	3	#NULL!	#NULL!	#NULL!
1182	1	1	2	1	0	#NULL!	#NULL!	0	0	#NULL!	#NULL!	0	0	#NULL!	#NULL!	0	0	#NULL!	#NULL!	0	0	#NULL!	#NULL!	0	0	#NULL!	#NULL!	0	0	#NULL!	#NULL!	0	4	5	5	#NULL!	#NULL!	2	2	#NULL!	3	#NULL!	3	#NULL!	#NULL!	5	#NULL!	4	#NULL!
1184	0	#NULL!	#NULL!	0	0	#NULL!	#NULL!	0	0	#NULL!	#NULL!	0	0	#NULL!	#NULL!	0	1	2	2	2	0	#NULL!	#NULL!	0	0	#NULL!	#NULL!	0	0	#NULL!	#NULL!	0	3	5	#NULL!	4	#NULL!	5	5	#NULL!	#NULL!	#NULL!	5	5	#NULL!	5	#NULL!	5	#NULL!
1187	0	#NULL!	#NULL!	0	1	3	4	1	0	#NULL!	#NULL!	0	0	#NULL!	#NULL!	0	1	2	2	2	1	2	1	1	0	#NULL!	#NULL!	0	0	#NULL!	#NULL!	0	3	4	4	#NULL!	#NULL!	4	4	#NULL!	2	1	4	3	5	3	#NULL!	4	#NULL!
1191	1	2	10	2	1	5	100	5	0	#NULL!	#NULL!	0	1	5	10000	4	1	2	5	1	1	3	20	4	0	#NULL!	#NULL!	0	1	3	50	4	3	5	5	5	5	5	3	#NULL!	#NULL!	#NULL!	2	#NULL!	3	4	#NULL!	4	#NULL!
1192	1	4	30	4	1	2	3	2	0	#NULL!	#NULL!	0	0	#NULL!	#NULL!	0	1	2	2	1	0	#NULL!	#NULL!	0	1	2	1	5	0	#NULL!	#NULL!	0	4	5	5	3	2	5	#NULL!	4	5	#NULL!	5	#NULL!	3	4	#NULL!	1	#NULL!
1194	0	#NULL!	#NULL!	0	1	2	3	3	0	#NULL!	#NULL!	0	0	#NULL!	#NULL!	0	1	3	5	5	1	1	2	5	1	2	2	5	1	2	1	5	4	5	5	4	2	5	4	2	2	2	5	#NULL!	5	3	5	5	#NULL!
1197	0	#NULL!	#NULL!	0	1	2	4	1	0	#NULL!	#NULL!	0	0	#NULL!	#NULL!	0	1	2	7	2	1	1	3	1	1	2	10	4	0	#NULL!	#NULL!	0	1	#NULL!	5	#NULL!	#NULL!	2	3	#NULL!	2	#NULL!	4	#NULL!	5	5	3	#NULL!	#NULL!
1199	0	#NULL!	#NULL!	0	1	3	10	3	0	#NULL!	#NULL!	0	0	#NULL!	#NULL!	0	1	1	5	4	1	1	1	4	1	1	1	5	0	#NULL!	#NULL!	0	5	5	5	5	#NULL!	5	#NULL!	#NULL!	5	5	5	4	5	5	5	5	#NULL!
1200	1	2	1	2	1	3	5	3	0	#NULL!	#NULL!	0	0	#NULL!	#NULL!	0	0	#NULL!	#NULL!	0	0	#NULL!	#NULL!	0	1	1	1	2	0	#NULL!	#NULL!	0	3	4	5	#NULL!	#NULL!	4	#NULL!	#NULL!	#NULL!	#NULL!	4	#NULL!	5	3	#NULL!	#NULL!	#NULL!
1204	0	#NULL!	#NULL!	0	1	2	4	3	0	#NULL!	#NULL!	0	0	#NULL!	#NULL!	0	1	2	2	4	0	#NULL!	#NULL!	0	0	#NULL!	#NULL!	0	0	#NULL!	#NULL!	0	4	#NULL!	4	#NULL!	#NULL!	4	#NULL!	5	#NULL!	#NULL!	4	4	4	5	4	#NULL!	#NULL!
1205	0	#NULL!	#NULL!	0	0	#NULL!	#NULL!	0	0	#NULL!	#NULL!	0	0	#NULL!	#NULL!	0	0	#NULL!	#NULL!	0	1	2	1	3	0	#NULL!	#NULL!	0	0	#NULL!	#NULL!	0	3	5	3	#NULL!	#NULL!	4	#NULL!	#NULL!	4	#NULL!	#NULL!	#NULL!	3	4	#NULL!	4	#NULL!
1206	0	#NULL!	#NULL!	0	1	2	5	2	0	#NULL!	#NULL!	0	0	#NULL!	#NULL!	0	1	2	10	4	1	2	3	3	1	2	2	2	1	4	20	5	5	2	4	4	5	4	2	2	5	2	1	5	3	3	4	1	1
1207	0	#NULL!	#NULL!	0	1	5	100	3	0	#NULL!	#NULL!	0	1	1	2	1	1	2	6	3	1	2	5	2	1	1	2	2	1	1	4	2	1	1	4	#NULL!	#NULL!	#NULL!	#NULL!	#NULL!	#NULL!	#NULL!	#NULL!	#NULL!	1	#NULL!	#NULL!	#NULL!	#NULL!
1208	0	#NULL!	#NULL!	0	1	1	2	2	0	#NULL!	#NULL!	0	0	#NULL!	#NULL!	0	1	5	10	3	0	#NULL!	#NULL!	0	0	#NULL!	#NULL!	0	1	1	1	1	5	5	5	5	5	5	#NULL!	#NULL!	5	3	2	#NULL!	#NULL!	5	3	#NULL!	#NULL!
1209	0	#NULL!	#NULL!	0	1	1	2	2	0	#NULL!	#NULL!	0	0	#NULL!	#NULL!	0	0	#NULL!	#NULL!	0	0	#NULL!	#NULL!	0	0	#NULL!	#NULL!	0	0	#NULL!	#NULL!	0	1	3	3	#NULL!	#NULL!	#NULL!	#NULL!	#NULL!	#NULL!	#NULL!	#NULL!	#NULL!	3	#NULL!	#NULL!	#NULL!	#NULL!
1210	0	#NULL!	#NULL!	0	1	5	1400	5	0	#NULL!	#NULL!	0	0	#NULL!	#NULL!	0	0	#NULL!	#NULL!	0	1	3	20	2	0	#NULL!	#NULL!	0	0	#NULL!	#NULL!	0	1	2	#NULL!	#NULL!	#NULL!	#NULL!	#NULL!	#NULL!	2	1	2	#NULL!	5	4	#NULL!	#NULL!	#NULL!
1213	0	#NULL!	#NULL!	0	0	#NULL!	#NULL!	0	0	#NULL!	#NULL!	0	0	#NULL!	#NULL!	0	1	1	3	4	0	#NULL!	#NULL!	0	0	#NULL!	#NULL!	0	0	#NULL!	#NULL!	0	2	2	5	4	#NULL!	#NULL!	#NULL!	#NULL!	4	#NULL!	3	#NULL!	5	4	#NULL!	#NULL!	#NULL!
1216	0	#NULL!	#NULL!	0	1	1	1	1	1	2	2	3	0	#NULL!	#NULL!	0	1	1	2	3	0	#NULL!	#NULL!	0	1	3	4	4	0	#NULL!	#NULL!	0	4	3	5	5	5	3	4	5	3	#NULL!	5	#NULL!	4	5	#NULL!	#NULL!	#NULL!
1223	0	#NULL!	#NULL!	0	1	3	10	3	0	#NULL!	#NULL!	0	0	#NULL!	#NULL!	0	1	1	1	5	1	1	1	1	1	1	1	1	0	#NULL!	#NULL!	0	3	#NULL!	5	5	#NULL!	3	#NULL!	#NULL!	3	#NULL!	3	2	4	1	5	#NULL!	#NULL!
1224	0	#NULL!	#NULL!	0	1	1	4	2	0	#NULL!	#NULL!	0	0	#NULL!	#NULL!	0	1	1	3	2	1	1	2	1	1	1	1	1	0	#NULL!	#NULL!	0	2	2	2	#NULL!	#NULL!	4	#NULL!	#NULL!	2	#NULL!	5	4	5	3	#NULL!	4	#NULL!
1228	0	#NULL!	#NULL!	0	1	3	3	2	0	#NULL!	#NULL!	0	1	3	2	5	1	2	1	1	0	#NULL!	#NULL!	0	1	2	1	5	0	#NULL!	#NULL!	0	5	3	5	2	#NULL!	5	#NULL!	#NULL!	#NULL!	#NULL!	5	3	5	5	#NULL!	#NULL!	#NULL!
1229	0	#NULL!	#NULL!	0	1	1	2	1	0	#NULL!	#NULL!	0	0	#NULL!	#NULL!	0	0	#NULL!	#NULL!	0	1	1	1	1	0	#NULL!	#NULL!	0	0	#NULL!	#NULL!	0	1	#NULL!	2	#NULL!	#NULL!	2	#NULL!	#NULL!	#NULL!	#NULL!	4	#NULL!	3	#NULL!	#NULL!	#NULL!	#NULL!
1234	0	#NULL!	#NULL!	0	1	2	4	2	0	#NULL!	#NULL!	0	0	#NULL!	#NULL!	0	1	2	3	3	1	3	10	4	1	2	3	3	0	#NULL!	#NULL!	0	3	4	5	#NULL!	#NULL!	4	5	#NULL!	#NULL!	#NULL!	5	3	3	5	2	3	#NULL!
[truncated: 98 more columns]
